# Supplementary material for: Low back pain in emergency ambulance workers in tertiary hospitals in China and its risk factors among ambulance nurses: a cross-sectional study
Source: PubMed Central journal article supplement — BMJ Open. 2019 Sep 18;9(9):e029264. doi: 10.1136/bmjopen-2019-029264 (PMC6756463; doi:10.1136/bmjopen-2019-029264), 2019-09-18
Supplement: bmjopen-2019-029264.draft_revisions.pdf [file bmjopen-2019-029264.draft_revisions.pdf]

# BMJ Open

BMJ Open is committed to open peer review. As part of this commitment we make the peer review history of every article we publish publicly available.

When an article is published we post the peer reviewers' comments and the authors' responses online. We also post the versions of the paper that were used during peer review. These are the versions that the peer review comments apply to.

The versions of the paper that follow are the versions that were submitted during the peer review process. They are not the versions of record or the final published versions. They should not be cited or distributed as the published version of this manuscript.

BMJ Open is an open access journal and the full, final, typeset and author-corrected version of record of the manuscript is available on our site with no access controls, subscription charges or pay-per-view fees (<http://bmjopen.bmj.com>).

If you have any questions on BMJ Open's open peer review process please email [info.bmjopen@bmj.com](mailto:info.bmjopen@bmj.com)

# BMJ Open

## Low back pain of emergency ambulance workers in tertiary hospitals in China and its risk factors among ambulance nurses: a cross-sectional study

|                               |                                                                                                                                                                                  |
|-------------------------------|----------------------------------------------------------------------------------------------------------------------------------------------------------------------------------|
| Journal:                      | <i>BMJ Open</i>                                                                                                                                                                  |
| Manuscript ID                 | bmjopen-2019-029264                                                                                                                                                              |
| Article Type:                 | Research                                                                                                                                                                         |
| Date Submitted by the Author: | 19-Jan-2019                                                                                                                                                                      |
| Complete List of Authors:     | Dong, Hongyun; Shouguang People's Hospital, Zhang, Qiong; Shouguang People's Hospital<br>Zhu, Chunji; Shouguang People's Hospital<br>Liu, Guangzeng; Shouguang People's Hospital |
| Keywords:                     | low back pain, ambulance, nurse                                                                                                                                                  |
|                               |                                                                                                                                                                                  |

SCHOLARONE™  
Manuscripts

**Title page****Title**

Low back pain of emergency ambulance workers in tertiary hospitals in China and its risk factors among ambulance nurses: a cross-sectional study

**Complete names (full first and last)**

Hongyun Dong; Qiong Zhang; Chunji Zhu; Guangzeng Liu

**The affiliation and address of all the authors**

Shouguang People's Hospital. Shouguang People's Hospital, NO. 45 Jiankang Street, Shouguang, Weifang, Shandong Province, China. 262700

**The e-mail address, and telephone number of the corresponding author**

ayouwang@163.com , 8615006697150

**Acknowledgements:** None.

**Competing interests statement:** None declared.

**Funding:** This research received no specific grant from any funding agencies in the public, commercial, or not-for-profit sectors.

1  
2  
3  
4 Low back pain of emergency ambulance workers in tertiary hospitals in China and  
5  
6 its risk factors among ambulance nurses: a cross-sectional study  
7  
8  
9

## 10 11 **Abstract**

### 12 13 **Objective**

14  
15 Low back pain (LBP) has become increasingly common among healthcare  
16  
17 providers and could cause serious consequences among nurses. Studies about the  
18  
19 prevalence of and risk factors for LBP among emergency ambulance workers are  
20  
21 scarce in China, and even the world. The study aimed to determine the prevalence of  
22  
23 LBP among ambulance workers including doctors, nurses, and drivers and to explore  
24  
25 the risk factors for ambulance nurses' chronic LBP.  
26  
27  
28  
29  
30  
31

### 32 33 **Design**

34  
35 Cross-sectional study.  
36

### 37 38 **Setting**

39  
40 Emergency ambulance systems from 38 tertiary hospitals were selected by random  
41  
42 cluster sampling.  
43  
44

### 45 46 **Participants**

47  
48 1560 ambulance workers completed the study.  
49

### 50 51 **Outcome measures**

52  
53 A paper-based questionnaire including the Nordic Musculoskeletal Questionnaire  
54  
55 evaluating LBP, Dutch Musculoskeletal Questionnaire assessing ergonomic factors  
56  
57 and Job Content Questionnaire assessing stress was used. Multivariate logistic  
58  
59  
60

1  
2  
3  
4 regression analysis was conducted to quantify the association of potential risk factors  
5  
6 with chronic LBP among ambulance nurses.  
7

### 8 9 **Results**

10  
11 The one-year prevalence of LBP lasting for at least 24 hours, seven days, three  
12 years was 86.1%, 50.6% and 21.1% respectively among 498 ambulance nurses,  
13  
14 70.5%, 36.4% and 15.8% among 519 doctors and 57.5%, 23.8% and 12.3% among  
15  
16 543 drivers. Factors contributing to chronic LBP among nurses were bending the  
17  
18 trunk frequently, heavy or awkward lifting, shift work, low job satisfaction, high  
19  
20 psychological fatigue, high psychological job demand, low job control  
21  
22 (decision-making authority and skill discretion), low workplace supervisor support,  
23  
24 old age, female sex and obesity.  
25  
26  
27  
28  
29  
30  
31

### 32 33 **Conclusions**

34  
35 LBP was extremely prevalent among ambulance nurses. Many factors, especially  
36  
37 psychosocial and ergonomic factors contributed to ambulance nurses' chronic LBP.  
38  
39  
40  
41  
42

### 43 44 **Strengths and limitations of this study**

45  
46 This is the first large-scale study on the prevalence of low back pain (LBP) among  
47  
48 emergency ambulance workers and risk factors of ambulance nurses' chronic LBP in  
49  
50 China.  
51

52  
53 Various factors including individual, psychosocial, ergonomic and organizational  
54  
55 factors were collected and analyzed in the study.  
56  
57

58  
59 The cross-sectional design and subjective measures of the study limited the causal  
60

1  
2  
3  
4 directions.  
5  
6  
7  
8

9 **Keywords**

10  
11 low back pain; ambulance; nurse

12  
13  
14 What this paper adds?

15  
16  
17 1. What is already known about this subject?

18  
19  
20 Low back pain (LBP) is prevalent among nurses and other healthcare providers.

21  
22  
23 Chronic or long-term LBP could cause serious consequences. But little is known  
24  
25 about the current LBP situation of emergency ambulance workers. Many factors  
26  
27 such as ergonomic, individual, organizational and psychological factors could  
28  
29 contribute to LBP but the effects were not the same in a certain working group.  
30  
31  
32

33  
34  
35 2. What are the new findings?

36  
37  
38 This is the first large-scale survey concerning LBP prevalence among emergency  
39  
40 ambulance workers and the risk factors among ambulance nurses in China and  
41  
42 even the first in the world. Ambulance nurses suffered LBP more than ambulance  
43  
44 doctors and drivers, and more than the general nursing population. Ergonomic and  
45  
46 psychological factors played important roles in the development of chronic LBP.  
47  
48  
49  
50

51  
52  
53 3. How might this impact on policy or clinical practice in the foreseeable future?

54  
55  
56 The LBP prevalence differences in different position of ambulance workers and  
57  
58 the chronic LBP risk factors among ambulance nurses screened out, especially  
59  
60

1  
2  
3  
4           ergonomic and psychological factors, would provide guideline information for  
5  
6           future intervention measures and for policy makers.  
7  
8  
9

## 10 11 12           **Introduction**

13  
14  
15           During the past decades, low back pain (LBP), has become one of the most  
16  
17           common musculoskeletal disorders and one of the most common occupational health  
18  
19           problems among nurses and other healthcare providers around the world <sup>1 2</sup> and been  
20  
21           one of the most leading causes of disease burden across the developed and developing  
22  
23           countries <sup>3</sup>. Chronic or severe LBP might have serious consequences such as reduced  
24  
25           quality of life, loss of working days, occupational disability and changing and/or  
26  
27           leaving a profession <sup>4</sup>.  
28  
29  
30  
31  
32

33  
34  
35  
36           Emergency ambulance service, as an essential part of the healthcare system,  
37  
38           provides pre-hospital medical emergency service for patients including carrying,  
39  
40           moving and transporting patients to an emergency center and treating in the  
41  
42           ambulance such as performing cardiopulmonary resuscitation. Ambulance workers  
43  
44           seemed to have more musculoskeletal disorders than the general working force <sup>5</sup>.  
45  
46           Worldwide, attention has been paid to the musculoskeletal disorders of ambulance  
47  
48           workers over the last decade <sup>5 6</sup>. But there has been limited data about the LBP  
49  
50           prevalence and risk factors among ambulance workers worldwide. Due to  
51  
52           musculoskeletal disorders, especially LBP, ambulance workers were reported to  
53  
54           suffer from a higher standardized early retirement than other healthcare providers and  
55  
56  
57  
58  
59  
60

1  
2  
3  
4 the general working force <sup>5 7</sup>. In Mainland China, scarce attention has been paid to the  
5  
6 emergency ambulance workers and no study so far has explored the prevalence of  
7  
8  
9 LBP among ambulance workers and their risk factors.  
10

11  
12  
13  
14 Studies <sup>8</sup> have reported that many factors could contribute to LBP including  
15  
16 individual, psychosocial, physical and organizational work factors. Psychosocial  
17  
18 factors including low job support, job dissatisfaction, and occupational stress, and  
19  
20 individual factors such as high BMI and being female could contribute to  
21  
22 musculoskeletal disorders of the back region revealed by a systematic review with  
23  
24 strong evidence<sup>9</sup>. But as to the LBP among a special occupational group, the above  
25  
26 factors do not have the same effects. Psychosocial factors at work such as stress,  
27  
28 fatigue and job dissatisfaction have been demonstrated to largely contribute to the  
29  
30 development of LBP in a follow-up study of 4500 Iranian industrial workers <sup>10</sup>.  
31  
32  
33  
34  
35  
36  
37  
38  
39  
40  
41  
42  
43  
44  
45  
46  
47  
48  
49  
50  
51  
52  
53  
54  
55  
56  
57  
58  
59  
60  
Therefore, ambulance nurses may also suffer from LBP resulted from psychosocial factors and the effect was not known. The current study aimed to evaluate the prevalence of LBP among the ambulance workers of different work position and to determine and quantify the association of influencing factors including occupational stress and other well-known factors such as ergonomic and individual factors with chronic LBP among ambulance nurses.



## Methods

### Participants

A cross-sectional survey was implemented from September to November in 2018. Considering LBP prevalence, number of independent variables in logistic regression and response rate, 38 hospitals were selected first by random cluster sampling from among all the tertiary hospitals in Shandong, China. Then, of the selected 38 hospitals, all the emergency ambulance workers who had at least one years of work experience as an ambulance worker were invited to participate. Exclusion criteria were as follows: workers who experienced trauma injury or serious diseases, part-time workers. A total of 1560 ambulance workers (498 nurses, 519 doctors and 543 drivers) completed our questionnaire and 158 (65 nurses, 49 doctors and 44 drivers) failed to participate due to long leaves for vacation, sick leave, maternity leave and personal affairs. As to the questionnaires filled incompletely, the participants were contacted and completed the questionnaire later. The response rate of the study was 90.8%.

The study was approved by the Ethics Committee of Shouguang People's Hospital. Informed consent was obtained before the participants were invited to participate.

### Questionnaire

A self-administered questionnaire was designed and revised after pilot study. The paper-based questionnaire consisted of four sections. Section one dealt with demographic information including age, sex, height, weight, marital status, smoking,

1  
2  
3  
4 alcohol consumption, educational level, marital status, children in household and  
5  
6 exercise.  
7

8  
9 Section two was a modified version of the Standardized Nordic Musculoskeletal  
10  
11 Questionnaire <sup>12</sup> which has been developed to collect the prevalence information of  
12  
13 musculoskeletal disorders in different parts of the body. The Chinese version of the  
14  
15 Nordic questionnaire has been validated and widely used by previous national studies  
16  
17 <sup>13 14</sup>. The participants were asked whether they had suffered from pain or discomfort  
18  
19 in the low back region lasting for at least 24 hours, lasting for at least seven days and  
20  
21 lasting for at least three months respectively in the preceding twelve months.  
22  
23  
24  
25  
26  
27  
28  
29

30 Section three dealt with work information and ergonomic factors mainly derived  
31  
32 from Dutch Musculoskeletal Questionnaire <sup>15</sup>, which has been validated <sup>13</sup>.  
33  
34 Ergonomic factors were measured using a dichotomous scale (Yes/No), and the  
35  
36 assessment of risk factors was qualitative in this study <sup>13 15</sup>. Participants were asked  
37  
38 whether they were often exposed to the ergonomic risk factors during their work.  
39  
40 Work information included work position (doctor, nurse, or driver), work shift (shift  
41  
42 work or day work), work age and employment status.  
43  
44  
45  
46  
47

48 Section four dealt with psychosocial factors including job satisfaction (high,  
49  
50 medium, low), self-perceived health status (very good, generally good, generally bad,  
51  
52 very bad), psychological fatigue (low, medium, high) and occupational stress assessed  
53  
54 by the Job Content Questionnaire (JCQ) which has been widely used in different  
55  
56 groups of numerous studies and showed good reliability and validity<sup>16</sup>. In our study,  
57  
58  
59  
60

1  
2  
3  
4 22 items of the original 49-item JCQ were applied and consisted of three dimensions:  
5  
6 psychological job demand (five items), job control including skill discretion (six items)  
7  
8 and decision-making authority (three items), and workplace social support including  
9  
10 supervisor social support (four items) and coworker social support (four items). Each  
11  
12 item was scored on a four-point Likert scale from “strongly disagree” to “strongly  
13  
14 agree”.  
15  
16  
17  
18  
19  
20  
21

## 22 Data analysis

23  
24 The Statistical Package for Social Sciences (SPSS), version 18.0 was used to  
25  
26 perform statistical analysis. Single-factor chi-square test, independent t-test, or rank  
27  
28 sum test was used to examine the differences between different groups of participants.  
29  
30 The association of physical, psychosocial, organizational and individual factors with  
31  
32 chronic LBP was first examined by univariate analysis such as t- test, chi-square test  
33  
34 or rank sum test. The significant factors selected in the univariate analysis then  
35  
36 entered into multivariate logistic regression analysis. Odds ratios (ORs) and 95%  
37  
38 confidence intervals (95% CI) were calculated to evaluate the effect of risk factors  
39  
40 with chronic LBP. In order to avoid an inaccurate and unstable logistic regression  
41  
42 model, the significant variable ‘work age’ in the univariate analysis was removed, and  
43  
44 ‘age’ was kept for the multivariate analysis as they showed collinearity in  
45  
46 relationships (  $> 0.6$ ) diagnosed by Spearman correlation matrix. The statistics for  
47  
48 variable entry and removal were set at  $P < 0.05$  and  $P > 0.1$  respectively in the  
49  
50 multivariate analysis. A 0.05 statistical significance level was set for all tests.  
51  
52  
53  
54  
55  
56  
57  
58  
59  
60

## Results

The mean age of the 498 ambulance nurses was  $31.1 \pm 7.6$  years, statistically younger than the ambulance doctors ( $35.7 \pm 6.9$ ) and drivers ( $38.4 \pm 9.5$ ). Most of the ambulance nurses were female, while most of the ambulance doctors and drivers were male. Most nurses never smoked. Ambulance nurses had a statistically younger work age as an ambulance worker than ambulance doctors and drivers. Ambulance nurses had a statistically higher educational level than drivers and lower than doctors. Nurses exercised less than doctors and drivers in their leisure time.

The one-year prevalence of LBP lasting for at least 24 hours, 7 days and 3 months was 86.1%, 50.6% and 21.1% respectively among ambulance nurses, 70.5%, 36.4% and 15.8% among doctors, and 57.5%, 23.8% and 12.3% among drivers. For more details, see Table 1.

Nurses with old age, female sex, higher BMI, shift work, more work years as an ambulance nurse or temporary/contract employment status, seemed to suffer from chronic LBP more. As to the ergonomic factors, walking for long periods of time, bending the trunk frequently, heavy or awkward lifting, bending or twisting the neck and maintaining shoulder abduction for long periods of time were all statistically associated with chronic LBP. For more details, see Table 2.

As to the psychosocial factors, scores of psychological job demand was positive associated with chronic LBP while scores of skill discretion, decision-making authority, workplace supervisor support and workplace coworker support were

1  
2  
3  
4 negatively associated with chronic LBP among ambulance nurses. Univariate analysis  
5  
6 also showed that health status, job satisfaction and psychological fatigue were all  
7  
8 associated with Chronic LBP. For more details, see Table 3.  
9  
10

11 Multivariate logistic regression analysis reveal that age, sex, BMI, work shift,  
12  
13 bending the trunk frequently, heavy or awkward lifting, psychological fatigue, job  
14  
15 satisfaction, psychological job demand, skill discretion, decision-making authority  
16  
17 and workplace supervisor support were independently associated with chronic LBP  
18  
19 among ambulance nurses. For more details, see Table 4.  
20  
21  
22  
23  
24  
25  
26

## 27 **Discussion**

28  
29  
30  
31  
32 To our knowledge, this is the first large-scale survey aimed to explore the LBP  
33  
34 prevalence among ambulance workers and the risk factors for chronic LBP among  
35  
36 ambulance nurses in China, even maybe the first in the world. The ambulance  
37  
38 workers participated in the study were randomly selected in Shandong, China and the  
39  
40 response rate of 90.8% was acceptable. We found the prevalence of LBP lasting for at  
41  
42 least 24 hours, for at least 7 days, and for at least three months was 86.1%, 50.6% and  
43  
44 21.1% respectively among ambulance nurses, 70.5%, 36.4% and 15.8% respectively  
45  
46 among ambulance doctors, and 57.5%, 23.8% and 12.3% respectively among  
47  
48 ambulance drivers. The risk factors screened out for the ambulance nurses' chronic  
49  
50 LBP were ergonomic factors (bending the trunk frequently, heavy or awkward lifting),  
51  
52 occupational stress (high psychological job demand, low job control and low  
53  
54  
55  
56  
57  
58  
59  
60

workplace supervisor support), high psychological fatigue, low job satisfaction, shift work and individual factors (age, sex, obese).

Limitations of our study included the use of self-reported measures and retrospective questionnaire. Therefore, it is inevitable to suffer from measurement bias. The cross-sectional design of the study precluded causal conclusions and a prospective cohort study might be needed in the future.

In our study, the prevalence rates of LBP lasting for at least 24 hours, for at least 7 days, and for at least three months among ambulance nurses were all statistically higher than that among ambulance doctors and drivers. To our knowledge, after searching several databases such as Medline, Embase, CNKI and Wanfang, research about the prevalence of LBP among ambulance workers was very limited so that comparison between different countries was not made. As to LBP lasting for at least 24 hours, the prevalence was higher among ambulance nurses than that among the general nursing personal in Greece (75%)<sup>17</sup>, Nepal (67%)<sup>18</sup>, Chinese Taiwan (66.0%)<sup>19</sup> and other countries<sup>8 17 20</sup>. As to chronic LBP (lasting for at least three months), the prevalence among ambulance nurses was higher than that among the nursing personal in Dutch (12%), Greek (11%)<sup>17</sup>, and Taiwan (8.6%)<sup>19</sup>. Although prevalence variance may exist between the above studies, more attention should be paid to the ambulance nurses' LBP and its risk factors need to be pinpointed.

Just as reported that most individuals would suffer from short-term or minor LBP in their whole life<sup>21</sup>, serious or chronic LBP was caused mainly due to work and

1  
2  
3  
4 other factors. Therefore, we analyzed the risk factors of chronic LBP other than  
5  
6 short-term LBP.  
7  
8

9  
10 Epidemiological studies have reported that LBP could be caused by combinations  
11  
12 of physical factors alone <sup>22</sup>. A cross-sectional study <sup>19</sup> in Taiwan found that certain  
13  
14 manual patient-transfer tasks played important roles in severe LBP (such as care  
15  
16 seeking, intense pain, and sick leave) than in minor LBP (pain lasting for at least 24  
17  
18 hours). Tasks such as often with twisted or bent posture or heavy lifting have been  
19  
20 demonstrated to cause high spinal stress <sup>23</sup>. Patient-handling, as one of the main tasks  
21  
22 of nurses, could generate a burden of severe biomechanical load on spinal parts of the  
23  
24 body and could impose compressive and shear forces on nurses' low spine <sup>24</sup>.  
25  
26  
27 Different from a cohort study <sup>25</sup> in Norway which found prolonged standing and  
28  
29 awkward lifting were important factors of the ergonomic factors for LBP, our study  
30  
31 found bending the trunk frequently and heavy or awkward lifting contributed to  
32  
33 chronic LBP, which again confirmed the above findings among ambulance nurses.  
34  
35  
36 Musculoskeletal loads and injuries resulted from patient-handling tasks need to be  
37  
38 reduced and could be reduced by efficient and cost-effective ergonomic intervention  
39  
40 measures including LBP knowledge learning, transferring equipments, lifting teams  
41  
42 and training on safe patient transfer techniques reported by previous studies<sup>26</sup>. For  
43  
44 example, in an intervention study <sup>27</sup> conducted in Turkey, ergonomic training was  
45  
46 proved to be an acceptable method to prevent LBP. Therefore, in order to prevent  
47  
48 chronic LBP among ambulance nurses, ergonomic intervention measures need to be  
49  
50 taken.  
51  
52  
53  
54  
55  
56  
57  
58  
59  
60

1  
2  
3  
4 Psychosocial factors are perceived feelings of the work environment which could  
5  
6 bring about psychological fatigue, job dissatisfaction and occupational stress<sup>28</sup>. Our  
7  
8 study found that high psychological job demand, low job control and low supervisor  
9  
10 support were independently associated with chronic LBP, consistent with other  
11  
12 studies<sup>29 30 31 23</sup>. A cross-sectional study<sup>29</sup> in Brazil confirmed that both physical and  
13  
14 psychosocial work demands were independently associated with LBP. In a  
15  
16 prospective study<sup>30</sup>, an increased risk of hospitalization due to musculoskeletal  
17  
18 disorders and an increased rate of musculoskeletal sickness absence were reported to  
19  
20 be associated with lack of job control. In other studies<sup>31 23</sup>, poor job content and low  
21  
22 workplace social support were also shown to be risk factors for back pain. In our  
23  
24 study, workplace coworker support was noted to be significantly associated with  
25  
26 chronic LBP in the univariate analysis but did not remain in the multivariate logistic  
27  
28 regression analysis, probably because the ambulance workers as a group to some  
29  
30 extent worked collaboratively and the factor of coworker support was not that  
31  
32 significantly important like other psychological factors. Our study also found that  
33  
34 psychological fatigue and job satisfaction were all associated with chronic LBP,  
35  
36 consistent with other studies<sup>6 32</sup> which showed that employees dissatisfied with their  
37  
38 work were more prone to complain of back pain. High psychological fatigue could not  
39  
40 only increase the possibility of worker injuries and medical errors, but also negatively  
41  
42 affect one's physical and mental work performance<sup>33</sup>. A cohort study<sup>25</sup> of the general  
43  
44 working population in Norway showed that psychosocial factors such as high  
45  
46 psychological job demands and low job control were reported as the most consistent  
47  
48  
49  
50  
51  
52  
53  
54  
55  
56  
57  
58  
59  
60



1  
2  
3  
4 and important predictors of LBP, in addition to ergonomic factors of prolonged  
5  
6 standing and awkward lifting. Emergency ambulance nursing work not only needs  
7  
8 high-intensity physical activity, but also demanding professional skills and rapid  
9  
10 response in emergencies, which increased their psychological demand. As is known to  
11  
12 us all, a perfect job without any negative psychosocial work factors does not exist.  
13  
14  
15 Therefore, an optimal job design proposed by Smith and Carayon-Sainfort was  
16  
17 recommended for ambulance nurses. And negative psychosocial work factors should  
18  
19 be decreased to an acceptable level in order to control chronic LBP among ambulance  
20  
21 nurses.  
22  
23  
24  
25  
26  
27  
28  
29

30 Multivariate logistic regression analysis also revealed that work shift (shift work vs.  
31  
32 day work) was independently associated with chronic LBP, which surprised us.  
33  
34 However, another cross-sectional study<sup>34</sup> of including 1203 Iranian petrochemical  
35  
36 employees also reported that musculoskeletal disorders in shift workers were  
37  
38 statistically more prevalent than in day workers. In a prospective study<sup>35</sup> of nurses'  
39  
40 aides, LBP related sick leaves were revealed to be correlated with working night shifts.  
41  
42 A study in Japan<sup>36</sup> found that a short rest or nap at night could help reduce  
43  
44 musculoskeletal pain. Proper management of shift work was reported to be important  
45  
46 in reducing health problems experienced by nurses<sup>37</sup>. Although the mechanism  
47  
48 between night shift work and chronic LBP has not been illuminated, measures such as  
49  
50 short rests at night and adequate nurses in shift work should be considered to reduce  
51  
52 exposure of LBP risk factors.  
53  
54  
55  
56  
57  
58  
59  
60

1  
2  
3  
4 Female ambulance nurses were noted to suffer from chronic LBP statistically more  
5  
6 than male nurses. Since most of the ambulance nurses were female around the world,  
7  
8 more attention should be given to the female nurses' health when introducing  
9  
10 interventions.  
11  
12  
13

14  
15  
16  
17 Age was found to be associated with chronic LBP but the effect was slight,  
18  
19 consistent with previous studies, probably because aging is associated with muscle  
20  
21 weakness and muscle atrophy which would lead to LBP<sup>38</sup>. Obesity was correlated  
22  
23 with chronic LBP, probably because excess abdominal weight pressure on the  
24  
25 vertebrae might trigger chronic spasms in the low back region <sup>39</sup>. Therefore,  
26  
27 maintaining a normal body weight seems important for preventing LBP among  
28  
29 ambulance nurses.  
30  
31  
32  
33

34  
35 As to the many risk factors of chronic LBP among ambulance nurses, one simple  
36  
37 intervention measure alone may not be inadequate. To achieve the aim of decreasing  
38  
39 musculoskeletal disorders in healthcare professionals, a multi-component intervention  
40  
41 was required revealed by previous reviews <sup>40</sup>. Therefore, comprehensive measures  
42  
43 need to be considered in order to prevent chronic LBP.  
44  
45  
46  
47  
48  
49

## 50 Conclusions

51  
52  
53 This study suggests a pretty high prevalence of LBP among ambulance nurses.  
54  
55  
56 Psychosocial factors such as stress and fatigue, and ergonomic factors such as  
57  
58 bending the trunk frequently and heavy or awkward lifting played important roles in  
59  
60

1  
2  
3  
4 the development of chronic LBP. Many factors including ergonomic, psychosocial,  
5  
6 organizational and individual factors contributed to chronic LBP among ambulance  
7  
8 nurses. Comprehensive intervention measures might be needed when to explore  
9  
10 prevention methods.  
11  
12  
13  
14  
15  
16

17 Contributors HD designed the study and drafted the manuscript. QZ participated in  
18  
19 the design of the work, data analysis and revising it. All authors participated in the  
20  
21 data collection, paper revising and final approval of the version to be published.  
22  
23  
24

25 Competing interests None declared.

26 Patient consent Obtained.

27 Ethics approval The Ethics Committee of Shouguang People's Hospital.

28 Data sharing statement No additional data are available.  
29  
30  
31  
32  
33  
34  
35  
36  
37

## 38 References

- 39  
40 1 Dawson AP, McLennan SN, Schiller SD, Jull GA, Hodges PW, Stewart S. Interventions to  
41  
42 prevent back pain and back injury in nurses: a systematic review. *Occup Environ Med*  
43  
44 2007;64:642-50.  
45  
46  
47 2 Bejia I, Younes M, Jamila HB et al. Prevalence and factors associated to low back pain among  
48  
49 hospital staff. *Joint Bone Spine* 2005;72:254-9.  
50  
51  
52 3 David GC. Ergonomic methods for assessing exposure to risk factors for work-related  
53  
54 musculoskeletal disorders. *Occup Med (Lond)* 2005;55:190-9.  
55  
56  
57 4 McDonald M, DiBonaventura M, Ullman S. Musculoskeletal pain in the workforce: the  
58  
59  
60

- 1  
2  
3  
4 effects of back, arthritis, and fibromyalgia pain on quality of life and work productivity. *J*  
5  
6  
7 *Occup Environ Med* 2011;53:765-70.  
8
- 9 5 Sterud T, Ekeberg O, Hem E. Health status in the ambulance services: a systematic review.  
10  
11 *BMC Health Serv Res* 2006;6:82.  
12
- 13  
14 6 Jones AY, Lee RY. Cardiopulmonary resuscitation and back injury in ambulance officers. *Int*  
15  
16 *Arch Occup Environ Health* 2005;78:332-6.  
17
- 18  
19 7 Rodgers LM. A five year study comparing early retirements on medical grounds in ambulance  
20  
21 personnel with those in other groups of health service staff. Part II: Causes of retirements.  
22  
23 *Occup Med (Lond)* 1998;48:119-32.  
24
- 25  
26  
27 8 Coluci MZ, Alexandria NM. Job factors related to musculoskeletal symptoms among nursing  
28  
29 personnel--a review. *Work* 2012;41 Suppl 1:2516-20.  
30
- 31  
32  
33 9 da Costa BR, Vieira ER. Risk factors for work-related musculoskeletal disorders: A  
34  
35 systematic review of recent longitudinal studies. *Am J Ind Med* 2010;53:285-323.  
36
- 37  
38 10 Ghaffari M, Alipour A, Farshad AA, Jensen I, Josephson M, Vingard E. Effect of  
39  
40 psychosocial factors on low back pain in industrial workers. *Occup Med (Lond)*  
41  
42 2008;58:341-7.  
43
- 44  
45  
46 11 Estryng-Behar M, van der Heijden B, Camerino D et al. Violence risks in nursing--results from  
47  
48 the European 'NEXT' Study. *Occup Med (Lond)* 2008;58:107-14.  
49
- 50  
51 12 Kuorinka I, Jonsson B, Kilbom A et al. Standardised Nordic questionnaires for the analysis of  
52  
53 musculoskeletal symptoms. *Appl Ergon* 1987;18:233-7.  
54
- 55  
56 13 Du WW, Wang S, Wang JX et al. [The assessment of reliability and validity of  
57  
58 musculoskeletal questionnaire]. *Zhonghua Lao Dong Wei Sheng Zhi Ye Bing Za Zhi*  
59  
60

- 1  
2  
3  
4 2012;30:335-8.  
5  
6  
7 14 Yu S, Lu ML, Gu G, Zhou W, He L, Wang S. Musculoskeletal symptoms and associated risk  
8  
9 factors in a large sample of Chinese workers in Henan province of China. *Am J Ind Med*  
10  
11 2012;55:281-93.  
12  
13  
14 15 Hildebrandt VH, Bongers PM, van Dijk FJ, Kemper HC, Dul J. Dutch Musculoskeletal  
16  
17 Questionnaire: description and basic qualities. *Ergonomics* 2001;44:1038-55.  
18  
19 16 Li J, Yang W, Liu P, Xu Z, Cho SI. Psychometric evaluation of the Chinese (mainland)  
20  
21 version of Job Content Questionnaire: a study in university hospitals. *Ind Health*  
22  
23 2004;42:260-7.  
24  
25  
26  
27 17 Alexopoulos EC, Burdorf A, Kalokerinou A. A comparative analysis on musculoskeletal  
28  
29 disorders between Greek and Dutch nursing personnel. *Int Arch Occup Environ Health*  
30  
31 2006;79:82-8.  
32  
33  
34  
35 18 Sharma S, Shrestha N, Jensen MP. Pain-related factors associated with lost work days in  
36  
37 nurses with low back pain: A cross-sectional study. *Scand J Pain* 2016;11:36-41.  
38  
39  
40 19 Feng CK, Chen ML, Mao IF. Prevalence of and risk factors for different measures of low back  
41  
42 pain among female nursing aides in Taiwanese nursing homes. *BMC Musculoskelet Disord*  
43  
44 2007;8:52.  
45  
46  
47  
48 20 Sadeghian F, Hosseinzadeh S, Aliyari R. Do Psychological Factors Increase the Risk for Low  
49  
50 Back Pain Among Nurses? A Comparing According to Cross-sectional and Prospective  
51  
52 Analysis. *Saf Health Work* 2014;5:13-6.  
53  
54  
55  
56 21 Scott NA, Moga C, Harstall C. Managing low back pain in the primary care setting: the  
57  
58 know-do gap. *Pain Res Manag* 2010;15:392-400.  
59  
60

- 1  
2  
3  
4 22 Punnett L, Pruss-Utun A, Nelson DI et al. Estimating the global burden of low back pain  
5  
6 attributable to combined occupational exposures. *Am J Ind Med* 2005;48:459-69.  
7  
8  
9 23 Warming S, Precht DH, Suadicani P, Ebbeltoft NE. Musculoskeletal complaints among nurses  
10  
11 related to patient handling tasks and psychosocial factors--based on logbook registrations.  
12  
13  
14  
15 *Appl Ergon* 2009;40:569-76.  
16  
17 24 Jager M, Jordan C, Theilmeyer A et al. Lumbar-load analysis of manual patient-handling  
18  
19 activities for biomechanical overload prevention among healthcare workers. *Ann Occup Hyg*  
20  
21 2013;57:528-44.  
22  
23  
24  
25 25 Sterud T, Tynes T. Work-related psychosocial and mechanical risk factors for low back pain:  
26  
27 a 3-year follow-up study of the general working population in Norway. *Occup Environ Med*  
28  
29 2013;70:296-302.  
30  
31  
32  
33 26 Hodder JN, MacKinnon SN, Ralhan A, Keir PJ. Effects of training and experience on patient  
34  
35 transfer biomechanics. *International Journal of Industrial Ergonomics* 2010;40:282-288.  
36  
37  
38 27 Karahan A, Bayraktar N. Effectiveness of an education program to prevent nurses' low back  
39  
40 pain: an interventional study in Turkey. *Workplace Health Saf* 2013;61:73-8.  
41  
42  
43 28 Huang GD, Feuerstein M, Sauter SL. Occupational stress and work-related upper extremity  
44  
45 disorders: concepts and models. *Am J Ind Med* 2002;41:298-314.  
46  
47  
48 29 Fernandes Rde C, Carvalho FM, Assuncao AA, Silvany Neto AM. Interactions between  
49  
50 physical and psychosocial demands of work associated to low back pain. *Rev Saude Publica*  
51  
52 2009;43:326-34.  
53  
54  
55  
56 30 Yip VY. New low back pain in nurses: work activities, work stress and sedentary lifestyle. *J*  
57  
58 *Adv Nurs* 2004;46:430-40.  
59  
60

- 1  
2  
3  
4 31 Louw QA, Morris LD, Grimmer-Somers K. The prevalence of low back pain in Africa: a  
5  
6 systematic review. *BMC Musculoskelet Disord* 2007;8:105.  
7  
8  
9 32 From the Centers for Disease Control and Prevention. Ambulance crash-related injuries  
10  
11 among Emergency Medical Services workers--United States, 1991-2002. *JAMA*  
12  
13 2003;289:1628-9.  
14  
15  
16 33 Barker LM, Nussbaum MA. The effects of fatigue on performance in simulated nursing work.  
17  
18 *Ergonomics* 2011;54:815-29.  
19  
20 34 Choobineh A, Soltanzadeh A, Tabatabaee H, Jahangiri M, Khavaji S. Health effects  
21  
22 associated with shift work in 12-hour shift schedule among Iranian petrochemical employees.  
23  
24 *Int J Occup Saf Ergon* 2012;18:419-27.  
25  
26  
27 35 Eriksen W, Bruusgaard D, Knardahl S. Work factors as predictors of intense or disabling low  
28  
29 back pain; a prospective study of nurses' aides. *Occup Environ Med* 2004;61:398-404.  
30  
31  
32 36 Takahashi M, Iwakiri K, Sotoyama M, Hirata M, Hisanaga N. Musculoskeletal pain and  
33  
34 night-shift naps in nursing home care workers. *Occup Med (Lond)* 2009;59:197-200.  
35  
36  
37 37 Nagai M, Morikawa Y, Kitaoka K et al. Effects of fatigue on immune function in nurses  
38  
39 performing shift work. *J Occup Health* 2011;53:312-9.  
40  
41  
42 38 Hoy D, Bain C, Williams G et al. A systematic review of the global prevalence of low back  
43  
44 pain. *Arthritis Rheum* 2012;64:2028-37.  
45  
46  
47 39 Meredith DS, Huang RC, Nguyen J, Lyman S. Obesity increases the risk of recurrent  
48  
49 herniated nucleus pulposus after lumbar microdiscectomy. *Spine J* 2010;10:575-80.  
50  
51  
52 40 Tullar JM, Brewer S, Amick BC, 3rd et al. Occupational safety and health interventions to  
53  
54 reduce musculoskeletal symptoms in the health care sector. *J Occup Rehabil*  
55  
56  
57  
58  
59  
60

1  
2  
3  
4  
5  
6  
7  
8  
9  
10  
11  
12  
13  
14  
15  
16  
17  
18  
19  
20  
21  
22  
23  
24  
25  
26  
27  
28  
29  
30  
31  
32  
33  
34  
35  
36  
37  
38  
39  
40  
41  
42  
43  
44  
45  
46  
47  
48  
49  
50  
51  
52  
53  
54  
55  
56  
57  
58  
59  
60

2010;20:199-219.

For peer review only



Table 1 Characteristics of emergency ambulance workers in tertiary hospitals

|                                          | Nurses    | Doctors   | P<br>(between<br>nurses<br>and<br>doctors) | Drivers   | P<br>(between<br>nurses<br>and<br>drivers) |
|------------------------------------------|-----------|-----------|--------------------------------------------|-----------|--------------------------------------------|
| Total number of subjects                 | 498       | 519       |                                            | 543       |                                            |
| Age (M±SD)                               | 31.1±7.6  | 35.7±6.9  | <0.001                                     | 38.4±9.5  | <0.001                                     |
| Sex                                      |           |           | <0.001                                     |           | <0.001                                     |
| Male                                     | 73        | 396       |                                            | 471       |                                            |
| Female                                   | 425       | 123       |                                            | 72        |                                            |
| BMI                                      |           |           | 0.009                                      |           | <0.001                                     |
| < 18.5 (Underweight)                     | 43        | 45        |                                            | 21        |                                            |
| 18.5~23.9 (Normal weight)                | 276       | 249       |                                            | 291       |                                            |
| 24.0~27.9 (Overweight)                   | 125       | 129       |                                            | 93        |                                            |
| ≥ 28.0 (Obesity)                         | 54        | 96        |                                            | 138       |                                            |
| Marital status                           |           |           | <0.001                                     |           | <0.001                                     |
| Never married                            | 75        | 91        |                                            | 32        |                                            |
| Married/cohabiting                       | 363       | 402       |                                            | 471       |                                            |
| Divorced/separated/widowed               | 60        | 26        |                                            | 40        |                                            |
| Smoking                                  |           |           | <0.001                                     |           | <0.001                                     |
| Never smoked                             | 485       | 159       |                                            | 75        |                                            |
| Ex-smoker                                | 10        | 147       |                                            | 111       |                                            |
| Current smoker                           | 3         | 213       |                                            | 357       |                                            |
| Workage as an ambulance worker<br>(M±SD) | 8.3±8     | 12.8±9.3  | <0.001                                     | 14.5±8.8  | <0.001                                     |
| Educational level                        |           |           | <0.001                                     |           | <0.001                                     |
| Lower than junior college                | 111       | 33        |                                            | 539       |                                            |
| Junior college                           | 261       | 97        |                                            | 3         |                                            |
| Bachelor                                 | 96        | 259       |                                            | 1         |                                            |
| Master or above                          | 30        | 132       |                                            | 0         |                                            |
| Exercise in leisure time                 |           |           | <0.001                                     |           | <0.001                                     |
| Never/almost never                       | 295       | 198       |                                            | 219       |                                            |
| Sometimes                                | 97        | 185       |                                            | 159       |                                            |
| Often                                    | 106       | 136       |                                            | 165       |                                            |
| LBP lasting for at least                 |           |           |                                            |           |                                            |
| 24 hours                                 | 429(86.1) | 366(70.5) | <0.001                                     | 312(57.5) | <0.001                                     |
| 7 days                                   | 252(50.6) | 189(36.4) | <0.001                                     | 129(23.8) | <0.001                                     |
| 3 months                                 | 105(21.1) | 82(15.8)  | 0.030                                      | 67(12.3)  | <0.001                                     |

T-test for "age" and "Workage as an ambulance worker". Chi-square test for "Sex", "Marital status", "Smoking" and "LBP". Rank sum test for "BMI", "Educational level" and "Exercise in leisure time".

Table 2 Univariate analysis of individual and ergonomic factors with chronic LBP among ambulance nurses.

| Factors                                                          | Chronic LBP sufferers | Non-chronic-LBP sufferers | P      |
|------------------------------------------------------------------|-----------------------|---------------------------|--------|
| Number of subjects                                               | 105                   | 393                       |        |
| Age                                                              | 36.5±7.7              | 29.7±6.7                  | <0.001 |
| Sex                                                              |                       |                           | 0.022  |
| Male                                                             | 8                     | 65                        |        |
| Female                                                           | 97                    | 328                       |        |
| BMI                                                              |                       |                           | <0.001 |
| < 18.5 (Underweight)                                             | 4                     | 39                        |        |
| 18.5~23.9 (Normal weight)                                        | 45                    | 231                       |        |
| 24.0~27.9 (Overweight)                                           | 29                    | 96                        |        |
| ≥ 28.0 (Obesity)                                                 | 27                    | 27                        |        |
| Work shift                                                       |                       |                           | <0.001 |
| Shift work                                                       | 60                    | 129                       |        |
| Day work                                                         | 45                    | 264                       |        |
| Workage as an ambulance nurse                                    | 13.8±8.7              | 6.8±7.2                   | <0.001 |
| Employment status                                                |                       |                           | 0.014  |
| Permanent                                                        | 39                    | 199                       |        |
| Temporary/contract                                               | 66                    | 194                       |        |
| Ergonomic factors                                                |                       |                           |        |
| Walking for long periods of time (Yes/No)                        | 54/51                 | 154/239                   | 0.024  |
| Bending the trunk frequently (Yes/No)                            | 66/39                 | 93/300                    | <0.001 |
| Heavy or awkward lifting (Yes/No)                                | 75/30                 | 112/281                   | <0.001 |
| Bending or twisting the neck (Yes/No)                            | 39/66                 | 97/296                    | 0.011  |
| Maintaining shoulder abduction for long periods of time (Yes/No) | 48/57                 | 136/257                   | 0.036  |

T-test for "age" and "workage as an ambulance nurse". Chi-square test for "Sex", "Work shift", "Employment status" and ergonomic factors. Rank sum test for BMI.

Table 3 Univariate analysis of psychosocial factors with chronic LBP among ambulance nurses.

| Psychosocial factors      | Chronic LBP |                           | P      |
|---------------------------|-------------|---------------------------|--------|
|                           | sufferers   | Non-chronic-LBP sufferers |        |
| Number of subjects        | 105         | 393                       |        |
| Occupational stress       |             |                           |        |
| Psychological job demand  | 14.5±4.1    | 11.1±3.2                  | <0.001 |
| Decision-making authority | 5.8±3.8     | 8.1±2.5                   | <0.001 |
| Skill discretion          | 11.7±5.3    | 16.2±4.6                  | <0.001 |
| Supervisor social support | 6.8±3.2     | 9.8±2.2                   | <0.001 |
| Coworker social support   | 8.7±3.8     | 10.3±2.6                  | <0.001 |
| Health status             |             |                           | 0.043  |
| Very good                 | 19          | 89                        |        |
| Generally good            | 25          | 109                       |        |
| Generally bad             | 29          | 117                       |        |
| Very bad                  | 32          | 78                        |        |
| Psychological fatigue     |             |                           | 0.004  |
| Low                       | 27          | 127                       |        |
| Medium                    | 45          | 207                       |        |
| High                      | 33          | 59                        |        |
| Job satisfaction          |             |                           | 0.025  |
| High                      | 42          | 187                       |        |
| Medium                    | 33          | 144                       |        |
| Low                       | 30          | 62                        |        |

T-test for components of occupational stress. Rank sum test for "Job satisfaction", "Psychological fatigue" and "Health status".

Table 4 Multivariate logistic regression analysis of Chronic LBP risk factors among ambulance nurses.

| Factors                               | B      | SE    | P      | OR (95% C.I.)        |
|---------------------------------------|--------|-------|--------|----------------------|
| Age                                   | 0.912  | 0.453 | 0.023  | 2.489 (1.024-6.049)  |
| Sex (1=female, 0=male)                | 0.891  | 0.381 | 0.017  | 2.438 (1.155-5.144)  |
| BMI                                   |        |       |        |                      |
| 18.5~23.9 (Normal weight)             |        |       |        | Reference            |
| < 18.5 (Underweight)                  | -0.641 | 0.546 | 0.513  | 0.527 (0.181-1.536)  |
| 24.0~27.9 (Overweight)                | 0.439  | 0.263 | 0.329  | 1.551 (0.926-2.597)  |
| ≥ 28.0 (Obesity)                      | 1.638  | 0.313 | <0.001 | 5.145 (2.786-9.502)  |
| Work shift (1=shift work, 0=day work) | 1.005  | 0.223 | <0.001 | 2.732 (1.765-4.229)  |
| Ergonomic factors                     |        |       |        |                      |
| Bending the trunk frequently          | 1.701  | 0.232 | <0.001 | 5.479 (3.477-8.634)  |
| Heavy or awkward lifting              | 1.838  | 0.242 | <0.001 | 6.284 (3.911-10.098) |
| Psychosocial factors                  |        |       |        |                      |
| Psychological fatigue                 |        |       |        |                      |
| Low                                   |        |       |        | Reference            |
| Medium                                | 0.021  | 0.267 | 0.214  | 1.021 (0.605-1.723)  |
| High                                  | 0.968  | 0.296 | <0.001 | 2.633 (1.474-4.703)  |
| Job satisfaction                      |        |       |        |                      |
| High                                  |        |       |        | Reference            |
| Medium                                | 0.031  | 0.262 | 0.154  | 1.031 (0.617-1.724)  |
| Low                                   | 0.768  | 0.279 | <0.001 | 2.155 (1.248-3.724)  |
| Occupational stress                   |        |       |        |                      |
| Psychological job demand              | 1.031  | 0.414 | <0.001 | 2.804 (1.246-6.312)  |
| Decision-making authority             | -0.924 | 0.411 | <0.001 | 0.397 (0.177-0.888)  |
| Skill discretion                      | -0.973 | 0.402 | <0.001 | 0.378 (0.172-0.831)  |
| Supervisor social support             | -1.213 | 0.393 | <0.001 | 0.297 (0.138-0.642)  |

# BMJ Open

## Low back pain in emergency ambulance workers in tertiary hospitals in China and its risk factors among ambulance nurses: a cross-sectional study

|                                 |                                                                                                                                                                                    |
|---------------------------------|------------------------------------------------------------------------------------------------------------------------------------------------------------------------------------|
| Journal:                        | <i>BMJ Open</i>                                                                                                                                                                    |
| Manuscript ID                   | bmjopen-2019-029264.R1                                                                                                                                                             |
| Article Type:                   | Original research                                                                                                                                                                  |
| Date Submitted by the Author:   | 24-Jun-2019                                                                                                                                                                        |
| Complete List of Authors:       | Zhang, Qiong; Shouguang People's Hospital<br>Dong, Hongyun; Shouguang People's Hospital<br>Zhu, Chunji; Shouguang People's Hospital<br>Liu, Guangzeng; Shouguang People's Hospital |
| <b>Primary Subject Heading</b>: | Occupational and environmental medicine                                                                                                                                            |
| Secondary Subject Heading:      | Occupational and environmental medicine, Public health                                                                                                                             |
| Keywords:                       | low back pain, ambulance, nurse, OCCUPATIONAL & INDUSTRIAL MEDICINE                                                                                                                |
|                                 |                                                                                                                                                                                    |

SCHOLARONE™  
Manuscripts

**Title page****Title**

Low back pain in emergency ambulance workers in tertiary hospitals in China and its risk factors among ambulance nurses: a cross-sectional study

**Complete names (full first and last)**

Qiong Zhang; Hongyun Dong; Chunji Zhu; Guangzeng Liu

**The affiliation and address of all the authors**

Shouguang People's Hospital. Shouguang People's Hospital, NO. 45 Jiankang Street, Shouguang, Weifang, Shandong Province, China. 262700

**The e-mail address, and telephone number of the corresponding author**

ayouwang@163.com , 8615006697150

**Acknowledgements:** None.

**Competing interests statement:** None declared.

**Funding:** This research received no specific grant from any funding agencies in the public, commercial, or not-for-profit sectors.

1  
2  
3  
4 Low back pain in emergency ambulance workers in tertiary hospitals in China and  
5  
6 its risk factors among ambulance nurses: a cross-sectional study  
7  
8  
9  
10

## 11 **Abstract**

### 12 **Objective**

13  
14  
15 Low back pain (LBP) could cause serious consequences and has been shown to be  
16  
17 prevalent among emergency ambulance workers. Studies on the prevalence of and  
18  
19 risk factors for LBP among emergency ambulance workers are scarce in China. The  
20  
21 study aimed to determine the prevalence of LBP among ambulance workers,  
22  
23 including doctors, nurses, and drivers, and to explore the risk factors for ambulance  
24  
25 nurses' chronic LBP.  
26  
27  
28  
29  
30  
31

### 32 **Design**

33  
34 Cross-sectional study.  
35  
36

### 37 **Setting**

38  
39  
40 Emergency ambulance systems from 38 tertiary hospitals were selected by random  
41  
42 cluster sampling.  
43  
44

### 45 **Participants**

46  
47 A total of 1560 ambulance workers completed the study.  
48  
49

### 50 **Outcome measures**

51  
52 A paper-based questionnaire that included the Nordic Musculoskeletal  
53  
54 Questionnaire, which evaluated LBP, the Dutch Musculoskeletal Questionnaire,  
55  
56 which assessed ergonomic factors, and the Job Content Questionnaire, which assessed  
57  
58  
59  
60

1  
2  
3  
4 stress, was used. Multivariate logistic regression analysis was conducted to quantify  
5  
6 the association of potential risk factors with chronic LBP among ambulance nurses.  
7

### 8 9 **Results**

10  
11 The one-year prevalence of LBP lasting for at least 24 hours, seven days and three  
12 months was 86.1%, 50.6% and 21.1%, respectively, among 498 ambulance nurses;  
13  
14 70.5%, 36.4% and 15.8% among 519 doctors; and 57.5%, 23.8% and 12.3% among  
15  
16 543 drivers. The factors contributing to chronic LBP among ambulance nurses were  
17  
18 the frequent bending of the trunk, heavy or awkward lifting, shift work, low job  
19  
20 satisfaction, high psychological fatigue, high psychological job demand, low job  
21  
22 control (decision-making authority and skill discretion), low workplace supervisor  
23  
24 support, older age, female sex and obesity.  
25  
26  
27  
28  
29  
30  
31

### 32 33 **Conclusions**

34  
35 LBP was more prevalent among ambulance nurses than among ambulance doctors  
36  
37 and drivers in Shandong, China. Many factors, especially psychosocial and ergonomic  
38  
39 factors, contributed to ambulance nurses' chronic LBP. Comprehensive measures  
40  
41 might be needed to control chronic LBP.  
42  
43  
44  
45  
46  
47

### 48 49 **Strengths and limitations of this study**

50  
51 This is the first large-scale study on the prevalence of low back pain (LBP) among  
52  
53 emergency ambulance workers and risk factors for ambulance nurses' chronic LBP in  
54  
55 China.  
56

57  
58 Various factors, including individual, psychosocial, ergonomic and organizational  
59  
60



factors, were collected and analysed in the study.

The cross-sectional design and subjective measures of the study limited the establishment of causal directions.

### **Keywords**

low back pain; ambulance; nurse

### **Introduction**

Emergency ambulance service, as an essential part of the healthcare system, provides pre-hospital medical emergency service for patients, including carrying, moving and transporting patients to an emergency centre and treating them in the ambulance, such as performing cardiopulmonary resuscitation. Ambulance workers have been reported to experience more musculoskeletal disorders than the general workforce<sup>1-4</sup>. In Denmark, data from a nationwide study showed that a substantially high proportion (42%) of 1689 ambulance personnel reported musculoskeletal pain, which was significantly higher than corresponding reports from the core workforce of 14,175 individuals (29%)<sup>5</sup>. In Australia, ambulance officers and paramedics had the highest rates for musculoskeletal injury compared with other healthcare workers in the 2003-2012 time period<sup>6</sup>. Worldwide, attention has been paid to the musculoskeletal disorders of ambulance workers over the last decade because of serious consequences, such as reduced quality of life, loss of working days,

1  
2  
3  
4 occupational disability and the need to change and/or leave a profession <sup>7</sup>. Due to  
5  
6 musculoskeletal disorders, especially low back pain (LBP), ambulance workers have  
7  
8  
9 been reported to suffer from a higher standardized early retirement than other  
10  
11 healthcare providers and the general workforce <sup>1 8</sup>. In mainland China, scarce  
12  
13 attention has been paid to emergency ambulance workers, and no study thus far has  
14  
15 explored the prevalence of LBP among ambulance workers and their risk factors.  
16  
17  
18  
19  
20  
21

22 Studies <sup>9</sup> have reported that many factors could contribute to LBP, including  
23  
24 individual, psychosocial, physical and organizational work factors. Psychosocial  
25  
26 factors, including low job support, job dissatisfaction, and occupational stress, and  
27  
28 individual factors, such as high BMI and being female, could contribute to  
29  
30 musculoskeletal disorders of the back region, as revealed by a systematic review with  
31  
32 strong evidence<sup>10</sup>. However, regarding the LBP among a special occupational group,  
33  
34 the above factors do not have the same effects. Psychosocial factors at work, such as  
35  
36 stress, fatigue and job dissatisfaction, have been demonstrated to largely contribute to  
37  
38 the development of LBP in a follow-up study of 4500 Iranian industrial workers <sup>11</sup>.  
39  
40  
41  
42  
43  
44  
45  
46  
47  
48  
49  
50  
51  
52  
53  
54  
55  
56  
57  
58  
59  
60  
Emergency ambulance workers, especially nurses, are faced with demanding nursing  
skills, rapid pace of work, episodes of violence, threats, increased risks of contracting  
infectious diseases and increasing demands on medical competence <sup>12</sup>. Therefore,  
ambulance nurses may also suffer from LBP resulting from psychosocial factors, and  
this effect is not known. The current study aimed to evaluate the prevalence of LBP  
among ambulance workers in different work positions and to determine and quantify

1  
2  
3  
4 the association between influencing factors, including individual, physical and  
5  
6 psychosocial factors, and chronic LBP among ambulance nurses.  
7  
8  
9

## 10 11 **Methods**

12  
13  
14 A cross-sectional survey was implemented from September to November 2018.  
15  
16  
17 The study was approved by the Ethics Committee of Shouguang People's Hospital.  
18  
19  
20 Informed consent was obtained before the participants were invited to participate.  
21  
22  
23

### 24 25 **Participants**

26  
27 Given the prevalence of LBP, the number of independent variables in the logistic  
28  
29 regression and the response rate, 38 hospitals were selected first by random cluster  
30  
31 sampling from among all the tertiary hospitals (182 tertiary-level hospitals in total) in  
32  
33 Shandong, China. Then, of the selected 38 hospitals, all the emergency ambulance  
34  
35 workers who had at least one year of work experience as an ambulance worker were  
36  
37 invited to participate with the help of the management departments and the directors  
38  
39 of emergency departments. The exclusion criteria were as follows: part-time workers  
40  
41 or workers who had experienced trauma, injury, or serious diseases. A total of 1560  
42  
43 ambulance workers (498 nurses, 519 doctors and 543 drivers) completed our  
44  
45 questionnaire, and the response rate of the study was 90.8%.  
46  
47  
48  
49  
50  
51  
52  
53  
54  
55

### 56 57 **Questionnaire**

58  
59 A self-administered questionnaire that included the Standardized Nordic  
60

1  
2  
3  
4 Musculoskeletal Questionnaire<sup>13</sup>, the Dutch Musculoskeletal Questionnaire<sup>14</sup> and the  
5  
6 Job Content Questionnaire<sup>15</sup>, was designed and revised after a pilot study. The  
7  
8 paper-based questionnaire consisted of four sections. Section one addresses  
9  
10 demographic information, including age, sex, height, weight, marital status, smoking,  
11  
12 alcohol consumption, educational level, marital status, children in the household and  
13  
14 exercise.  
15  
16  
17  
18

19 Section two was a modified version of the Standardized Nordic Musculoskeletal  
20  
21 Questionnaire. The Chinese version of the Nordic questionnaire has been widely used,  
22  
23 validated and contextualized by previous national studies according to a cross-cultural  
24  
25 understanding of the Chinese population<sup>16-18</sup>. The participants were asked whether  
26  
27 they had suffered from pain or discomfort in the low back region lasting for at least 24  
28  
29 hours, for at least seven days and lasting for at least three months in the preceding  
30  
31 twelve months. If a participant reported LBP lasting for at least three months in the  
32  
33 past twelve months, he or she was considered to have chronic LBP<sup>19</sup>.  
34  
35  
36  
37  
38  
39  
40  
41  
42

43 Section three addresses work information and ergonomic factors mainly derived  
44  
45 from Dutch Musculoskeletal Questionnaire<sup>14</sup>, which has been systematically  
46  
47 translated into Chinese<sup>16</sup> and validated<sup>17</sup>. Ergonomic factors were measured using a  
48  
49 dichotomous scale (yes/no), and the assessment of risk factors was qualitative in this  
50  
51 study<sup>14 17</sup>. Participants were asked whether they were often exposed to the ergonomic  
52  
53 risk factors during their work without further explanation. Work information included  
54  
55 work position (doctor, nurse, or driver), work shift (shift work or day work), work  
56  
57  
58  
59  
60

1  
2  
3  
4 experience and employment status (permanent vs. temporary/contract).  
5

6 Section four addresses psychosocial factors, including job satisfaction (high,  
7  
8 medium, low), self-perceived health status (very good, generally good, generally bad,  
9  
10 very bad), psychological fatigue (low, medium, high) and occupational stress assessed  
11  
12 by the Job Content Questionnaire (JCQ), which has been widely used in different  
13  
14 groups of numerous studies and has shown good reliability and validity in the Chinese  
15  
16 working population<sup>15</sup>. In our study, 22 items of the original 49-item JCQ, whose  
17  
18 content validity indices were all above 0.80, were applied and consisted of three  
19  
20 dimensions: psychological job demand (five items); job control, including skill  
21  
22 discretion (six items) and decision-making authority (three items); and workplace  
23  
24 social support, including supervisor social support (four items) and co-worker social  
25  
26 support (four items). Each item was scored on a four-point Likert scale from “strongly  
27  
28 disagree” to “strongly agree”, with higher scores indicating higher psychological job  
29  
30 demand, higher job control and higher workplace social support. In this study,  
31  
32 Cronbach’s  $\alpha$  coefficients for psychological job demand, job control and workplace  
33  
34 social support were 0.79, 0.87 and 0.90, respectively.  
35  
36  
37  
38  
39  
40  
41  
42  
43  
44  
45  
46  
47

#### 48 Data analysis

49  
50 The Statistical Package for Social Sciences (SPSS), version 18.0, was used to  
51  
52 perform statistical analysis. A single-factor chi-square test, independent t-test, or  
53  
54 rank-sum test was used to examine the differences between different groups of  
55  
56 participants. The association of physical, psychosocial, organizational and individual  
57  
58  
59  
60

1  
2  
3  
4 factors with chronic LBP (lasting for at least three months) was first examined with  
5  
6 univariate analysis, such as t-tests, chi-square tests or rank-sum tests. The significant  
7  
8 factors selected in the univariate analysis were then entered into multivariate logistic  
9  
10 regression analysis. Odds ratios (ORs) and 95% confidence intervals (95% CI) were  
11  
12 calculated to evaluate the effect of risk factors on chronic LBP. To avoid an  
13  
14 inaccurate and unstable logistic regression model, the significant variable 'work  
15  
16 experience' in the univariate analysis was removed, and 'age' was kept for the  
17  
18 multivariate analysis, as it showed collinearity in relationships ( $\rho > 0.6$ ) diagnosed by  
19  
20 Spearman correlation matrix. The statistics for variable entry and removal were set at  
21  
22  $P < 0.05$  and  $P > 0.1$ , respectively, in the multivariate analysis. A 0.05 statistical  
23  
24 significance level was set for all tests.

#### 31 32 Patient and public involvement

33  
34 No patients or members of the public were involved in the design or  
35  
36 implementation of the study. The results of the study were disseminated to the health  
37  
38 authorities and the selected 38 hospitals.

#### 41 42 43 44 45 **Results**

46  
47 All 1560 questionnaires (498 ambulance nurses, 519 doctors and 543 drivers) were  
48  
49 included in the study, and with respect to the questionnaires that were not fully  
50  
51 completed, the participants were contacted again and completed the questionnaire  
52  
53 later. Approximately 158 individuals (65 ambulance nurses, 49 doctors and 44 drivers)  
54  
55 failed to participate in the survey due to long leaves for vacation, sick leave, maternity  
56  
57  
58  
59  
60

leave and personal affairs.

The mean age of the 498 ambulance nurses was  $31.1 \pm 7.6$  years, which was significantly younger than the mean age of the ambulance doctors ( $35.7 \pm 6.9$ ) and drivers ( $38.4 \pm 9.5$ ). Most of the ambulance nurses were female, while most of the ambulance doctors and drivers were male. Most nurses never smoked. Ambulance nurses had significantly less work experience as an ambulance worker ( $8.3 \pm 8.0$  years) than did ambulance doctors ( $12.8 \pm 9.3$  years) and drivers ( $14.5 \pm 8.8$  years). Ambulance nurses had an educational level that was significantly higher than that of drivers and lower than that of doctors, and the rank-sum test is shown in Table 1. Nurses exercised less than doctors and drivers did in their leisure time (Table 1).

The twelve-month prevalence of LBP lasting for at least 24 hours, 7 days and 3 months was 86.1%, 50.6% and 21.1%, respectively, among ambulance nurses; 70.5%, 36.4% and 15.8% among doctors; and 57.5%, 23.8% and 12.3% among drivers. For more details, see Table 1.

Table 1 Characteristics of emergency ambulance workers in tertiary hospitals

|                           | Nurses         | Doctors        | $P^1$  | Drivers        | $P^2$  |
|---------------------------|----------------|----------------|--------|----------------|--------|
| Total number of subjects  | 498            | 519            |        | 543            |        |
| Age (M $\pm$ SD)          | $31.1 \pm 7.6$ | $35.7 \pm 6.9$ | <0.001 | $38.4 \pm 9.5$ | <0.001 |
| Sex                       |                |                | <0.001 |                | <0.001 |
| Male                      | 73 (14.7%)     | 396 (76.3%)    |        | 471 (86.7%)    |        |
| Female                    | 425 (85.3%)    | 123 (23.7%)    |        | 72 (13.3%)     |        |
| BMI                       |                |                | 0.009  |                | <0.001 |
| < 18.5 (Underweight)      | 43 (8.6%)      | 45 (8.7%)      |        | 21 (3.9%)      |        |
| 18.5~23.9 (Normal weight) | 276 (55.4%)    | 249 (48.0%)    |        | 291 (53.6%)    |        |
| 24.0~27.9 (Overweight)    | 125 (25.1%)    | 129 (24.9%)    |        | 93 (17.1%)     |        |
| $\geq$ 28.0 (Obesity)     | 54 (10.8%)     | 96 (18.5%)     |        | 138 (25.4%)    |        |

|                                               |             |             |        |             |        |
|-----------------------------------------------|-------------|-------------|--------|-------------|--------|
| Marital status                                |             |             | <0.001 |             | <0.001 |
| Never married                                 | 75 (15.1%)  | 91 (17.5%)  |        | 32 (5.9%)   |        |
| Married/cohabiting                            | 363 (72.9%) | 402 (77.5%) |        | 471 (86.7%) |        |
| Divorced/separated/widowed                    | 60 (12.0%)  | 26 (5.0%)   |        | 40 (7.4%)   |        |
| Smoking                                       |             |             | <0.001 |             | <0.001 |
| Never smoked                                  | 485 (97.4%) | 159 (30.6%) |        | 75 (13.8%)  |        |
| Ex-smoker                                     | 10 (2.0%)   | 147 (28.3%) |        | 111 (20.4%) |        |
| Current smoker                                | 3 (0.6%)    | 213 (41.0%) |        | 357 (65.7%) |        |
| Work experience as an ambulance worker (M±SD) | 8.3±8.0     | 12.8±9.3    | <0.001 | 14.5±8.8    | <0.001 |
| Educational level                             |             |             | <0.001 |             | <0.001 |
| Lower than junior college                     | 111 (22.3%) | 33 (6.4%)   |        | 539 (99.3%) |        |
| Junior college                                | 261 (52.4%) | 96 (18.5%)  |        | 3 (0.6%)    |        |
| Bachelor                                      | 96 (19.3%)  | 258 (49.7%) |        | 1 (0.2%)    |        |
| Master or above                               | 30 (6.0%)   | 132 (25.4%) |        | 0 (0.0%)    |        |
| Exercise in leisure time                      |             |             | <0.001 |             | <0.001 |
| Never/almost never                            | 295 (59.2%) | 198 (38.2%) |        | 219 (40.3%) |        |
| Sometimes                                     | 97 (19.5%)  | 185 (35.6%) |        | 159 (29.3%) |        |
| Often                                         | 106 (21.3%) | 136 (26.2%) |        | 165 (30.4%) |        |
| LBP lasting for at least                      |             |             |        |             |        |
| 24 hours                                      | 429(86.1%)  | 366(70.5%)  | <0.001 | 312(57.5%)  | <0.001 |
| 7 days                                        | 252(50.6%)  | 189(36.4%)  | <0.001 | 129(23.8%)  | <0.001 |
| 3 months                                      | 105(21.1%)  | 82(15.8%)   | 0.030  | 67(12.3%)   | <0.001 |

1 P value between ambulance nurses and doctors. 2 P value between ambulance nurses and drivers. T-test for “age” and “work experience as an ambulance worker”. Chi-square test for “sex”, “marital status”, “smoking” and “LBP”. Rank-sum test for “BMI”, “educational level” and “exercise in leisure time”.

Ambulance nurses who were older in age, were female, had higher BMI, performed shift work, and had worked longer as an ambulance worker or in temporary/contract employment seemed to suffer from chronic LBP more. Regarding ergonomic factors, walking for long periods of time, the frequent bending of the trunk, heavy or awkward lifting, bending or twisting the neck and maintaining shoulder abduction for long periods of time were all statistically associated with chronic LBP. For more details,



see Table 2.

Table 2 Univariate analysis of individual and ergonomic factors with chronic LBP among ambulance nurses.

| Factors                                                          | Chronic LBP | Non-chronic-LBP | <i>P</i> |
|------------------------------------------------------------------|-------------|-----------------|----------|
| Number of subjects                                               | 105         | 393             |          |
| Age                                                              | 36.5±7.7    | 29.7±6.7        | <0.001   |
| Sex                                                              |             |                 | 0.022    |
| Male                                                             | 8           | 65              |          |
| Female                                                           | 97          | 328             |          |
| BMI                                                              |             |                 | <0.001   |
| < 18.5 (Underweight)                                             | 4           | 39              |          |
| 18.5~23.9 (Normal weight)                                        | 45          | 231             |          |
| 24.0~27.9 (Overweight)                                           | 29          | 96              |          |
| ≥ 28.0 (Obesity)                                                 | 27          | 27              |          |
| Work shift                                                       |             |                 | <0.001   |
| Shift work                                                       | 60          | 129             |          |
| Day work                                                         | 45          | 264             |          |
| Work experience as an ambulance worker                           | 13.8±8.7    | 6.8±7.2         | <0.001   |
| Employment status                                                |             |                 | 0.014    |
| Permanent                                                        | 39          | 199             |          |
| Temporary/contract                                               | 66          | 194             |          |
| Ergonomic factors                                                |             |                 |          |
| Walking for long periods of time (Yes/No)                        | 54/51       | 154/239         | 0.024    |
| Frequent bending of the trunk (Yes/No)                           | 66/39       | 93/300          | <0.001   |
| Heavy or awkward lifting (Yes/No)                                | 75/30       | 112/281         | <0.001   |
| Bending or twisting the neck (Yes/No)                            | 39/66       | 97/296          | 0.011    |
| Maintaining shoulder abduction for long periods of time (Yes/No) | 48/57       | 136/257         | 0.036    |

T-test for “age” and “work experience as an ambulance worker”. Chi-square test for “sex”, “work shift”, “employment status” and ergonomic factors. Rank-sum test for BMI.

Regarding the psychosocial factors, scores on psychological job demand were positively associated with chronic LBP, while scores on skill discretion, decision-making authority, workplace supervisor support and workplace co-worker support were negatively associated with chronic LBP among ambulance nurses.

Univariate analysis also showed that self-perceived health status, job satisfaction and psychological fatigue were all associated with chronic LBP. For more details, see Table 3.

Table 3 Univariate analysis of psychosocial factors with chronic LBP among ambulance nurses.

| Psychosocial factors      | Chronic LBP | Non-chronic-LBP | <i>P</i> |
|---------------------------|-------------|-----------------|----------|
| Number of subjects        | 105         | 393             |          |
| Occupational stress       |             |                 |          |
| Psychological job demand  | 14.5±4.1    | 11.1±3.2        | <0.001   |
| Decision-making authority | 5.8±3.8     | 8.1±2.5         | <0.001   |
| Skill discretion          | 11.7±5.3    | 16.2±4.6        | <0.001   |
| Supervisor social support | 6.8±3.2     | 9.8±2.2         | <0.001   |
| Coworker social support   | 8.7±3.8     | 10.3±2.6        | <0.001   |
| Health status             |             |                 | 0.043    |
| Very good                 | 19          | 89              |          |
| Generally good            | 25          | 109             |          |
| Generally bad             | 29          | 117             |          |
| Very bad                  | 32          | 78              |          |
| Psychological fatigue     |             |                 | 0.004    |
| Low                       | 27          | 127             |          |
| Medium                    | 45          | 207             |          |
| High                      | 33          | 59              |          |
| Job satisfaction          |             |                 | 0.025    |
| High                      | 42          | 187             |          |
| Medium                    | 33          | 144             |          |
| Low                       | 30          | 62              |          |

T-test for components of occupational stress. Rank-sum test for “job satisfaction”, “psychological fatigue” and “health status”.

Multivariate logistic regression analysis revealed that age, sex, BMI, work shift, frequent bending of the trunk, heavy or awkward lifting, psychological fatigue, job satisfaction, psychological job demand, skill discretion, decision-making authority and workplace supervisor support were independently associated with chronic LBP among ambulance nurses. For more details, see Table 4.

Table 4 Multivariate logistic regression analysis of chronic LBP risk factors among ambulance nurses.

| Factors                               | B       | SE     | P       | OR (95% C.I.)        |
|---------------------------------------|---------|--------|---------|----------------------|
| Age                                   | 0. 912  | 0. 453 | 0. 023  | 2.489 (1.024-6.049)  |
| Sex (1=female, 0=male)                | 0. 891  | 0. 381 | 0. 017  | 2.438 (1.155-5.144)  |
| BMI                                   |         |        |         |                      |
| 18.5~23.9 (Normal weight)             |         |        |         | Reference            |
| < 18.5 (Underweight)                  | -0. 641 | 0. 546 | 0. 513  | 0.527 (0.181-1.536)  |
| 24.0~27.9 (Overweight)                | 0. 439  | 0. 263 | 0. 329  | 1.551 (0.926-2.597)  |
| ≥ 28.0 (Obesity)                      | 1. 638  | 0. 313 | <0. 001 | 5.145 (2.786-9.502)  |
| Work shift (1=shift work, 0=day work) | 1. 005  | 0. 223 | <0. 001 | 2.732 (1.765-4.229)  |
| Ergonomic factors                     |         |        |         |                      |
| Frequent bending of the trunk         | 1. 701  | 0. 232 | <0. 001 | 5.479 (3.477-8.634)  |
| Heavy or awkward lifting              | 1. 838  | 0. 242 | <0. 001 | 6.284 (3.911-10.098) |
| Psychosocial factors                  |         |        |         |                      |
| Psychological fatigue                 |         |        |         |                      |
| Low                                   |         |        |         | Reference            |
| Medium                                | 0. 021  | 0. 267 | 0. 214  | 1.021 (0.605-1.723)  |
| High                                  | 0. 968  | 0. 296 | <0. 001 | 2.633 (1.474-4.703)  |
| Job satisfaction                      |         |        |         |                      |
| High                                  |         |        |         | Reference            |
| Medium                                | 0. 031  | 0. 262 | 0. 154  | 1.031 (0.617-1.724)  |
| Low                                   | 0. 768  | 0. 279 | <0. 001 | 2.155 (1.248-3.724)  |
| Occupational stress                   |         |        |         |                      |
| Psychological job demand              | 1. 031  | 0. 414 | <0. 001 | 2.804 (1.246-6.312)  |
| Decision-making authority             | -0. 924 | 0. 411 | <0. 001 | 0.397 (0.177-0.888)  |
| Skill discretion                      | -0. 973 | 0. 402 | <0. 001 | 0.378 (0.172-0.831)  |
| Supervisor social support             | -1. 213 | 0. 393 | <0. 001 | 0.297 (0.138-0.642)  |

Multivariate logistic regression analysis also revealed that age, sex, BMI, frequent bending of the trunk and psychological job demand were associated with chronic LBP among ambulance doctors and that age, BMI, sitting for long periods of time and psychological fatigue were associated with chronic LBP among ambulance drivers. For more details, see Table 5.

Table 5 Multivariate logistic regression analysis of chronic LBP risk factors among ambulance

doctors and among ambulance drivers.

| Factors                          | B      | SE    | P      | OR (95% C.I.)        |
|----------------------------------|--------|-------|--------|----------------------|
| For doctors' chronic LBP         |        |       |        |                      |
| Age                              | 1.031  | 0.448 | <0.001 | 2.804 (1.165-6.747)  |
| Sex (1=female, 0=male)           | 0.502  | 0.253 | 0.034  | 1.652 (1.006-2.713)  |
| BMI                              |        |       |        |                      |
| 18.5~23.9 (Normal weight)        |        |       |        | Reference            |
| < 18.5 (Underweight)             | -0.537 | 0.512 | 0.427  | 0.584 (0.214-1.594)  |
| 24.0~27.9 (Overweight)           | 0.556  | 0.309 | 0.141  | 1.744 (0.952-3.195)  |
| ≥ 28.0 (Obesity)                 | 1.571  | 0.322 | <0.001 | 4.811 (2.560-9.044)  |
| Ergonomic factors                |        |       |        |                      |
| Frequent bending of the trunk    | 1.313  | 0.352 | <0.001 | 3.717 (1.865-7.411)  |
| Psychosocial factors             |        |       |        |                      |
| Occupational stress              |        |       |        |                      |
| Psychological job demand         | 1.055  | 0.401 | <0.001 | 2.872 (1.309-6.303)  |
| For drivers' chronic LBP         |        |       |        |                      |
| Age                              | 1.115  | 0.501 | 0.004  | 3.050 (1.142-8.141)  |
| BMI                              |        |       |        |                      |
| 18.5~23.9 (Normal weight)        |        |       |        | Reference            |
| < 18.5 (Underweight)             | -0.722 | 0.473 | 0.643  | 0.486 (0.192-1.228)  |
| 24.0~27.9 (Overweight)           | 0.948  | 0.305 | <0.001 | 2.581 (1.419-4.692)  |
| ≥ 28.0 (Obesity)                 | 1.804  | 0.354 | <0.001 | 6.074 (3.035-12.156) |
| Ergonomic factors                |        |       |        |                      |
| Sitting for long periods of time | 1.936  | 0.315 | <0.001 | 6.931 (3.738-12.851) |
| Psychosocial factors             |        |       |        |                      |
| Psychological fatigue            |        |       |        |                      |
| Low                              |        |       |        | Reference            |
| Medium                           | 0.557  | 0.275 | 0.002  | 1.745 (1.018-2.992)  |
| High                             | 1.011  | 0.311 | <0.001 | 2.748 (1.494-5.056)  |

## Discussion

To our knowledge, this is the first large-scale survey aimed at exploring the LBP prevalence among ambulance workers and the risk factors for chronic LBP among ambulance nurses in China. The ambulance workers participating in the study were randomly selected in Shandong, China, and the response rate of 90.8% was acceptable.

1  
2  
3  
4 We found that the twelve-month prevalence of LBP lasting for at least 24 hours, for at  
5  
6 least 7 days, and for at least three months was 86.1%, 50.6% and 21.1%, respectively,  
7  
8 among ambulance nurses; 70.5%, 36.4% and 15.8%, respectively, among ambulance  
9  
10 doctors; and 57.5%, 23.8% and 12.3%, respectively, among ambulance drivers. The  
11  
12 risk factors that were found for the ambulance nurses' chronic LBP were ergonomic  
13  
14 factors (frequent bending of the trunk, heavy or awkward lifting), occupational stress  
15  
16 factors (high psychological job demand, low job control and low workplace supervisor  
17  
18 support), high psychological fatigue, low job satisfaction, shift work and individual  
19  
20 factors (age, sex, obesity). The limitations of our study included the use of  
21  
22 self-reported measures and retrospective questionnaires. Therefore, it is inevitable to  
23  
24 suffer from measurement bias. The cross-sectional design of the study precluded  
25  
26 causal conclusions, and a prospective cohort study might be needed in the future.  
27  
28 Some of the 158 subjects who failed to participate in the study might suffer from LBP,  
29  
30 and the subjects who had left their ambulance position due to serious LBP were not  
31  
32 included in the study. Therefore, the prevalence of LBP and the extent of its risk  
33  
34 factors might be underestimated accordingly.

35  
36 In our study, the prevalence of LBP lasting for at least 24 hours, for at least 7 days,  
37  
38 and for at least three months among ambulance nurses was statistically higher than  
39  
40 that among ambulance doctors and drivers. Regarding LBP lasting for at least 24  
41  
42 hours, the prevalence was higher among ambulance nurses than among the general  
43  
44 nursing personnel in Greece (75%)<sup>20</sup>, Nepal (67%)<sup>21</sup>, Chinese Taiwan (66.0%)<sup>22</sup> and  
45  
46 other countries<sup>9 20 23</sup>. Regarding chronic LBP (lasting for at least three months), the  
47  
48  
49  
50  
51  
52  
53  
54  
55  
56  
57  
58  
59  
60

1  
2  
3  
4 prevalence among ambulance nurses was higher than that among the nursing  
5  
6 personnel in the Netherlands (12%), Greece (11%)<sup>20</sup>, and Taiwan (8.6%)<sup>22</sup>. Although  
7  
8 measurement variance, cultural differences and differences in the perception of  
9  
10 terminology may exist among the above mentioned studies, more attention should be  
11  
12 paid to the ambulance nurses' LBP and its risk factors need to be identified.  
13  
14  
15  
16  
17  
18  
19

20 As reported, most individuals suffer from short-term or minor LBP at some point in  
21  
22 their lives<sup>24</sup>, and most acute LBP is a self-limiting symptom with a recovery rate of  
23  
24 90% within six weeks<sup>19 25</sup>. Serious or chronic LBP was caused mainly by work and  
25  
26 other factors. Therefore, we analysed the risk factors of chronic LBP other than  
27  
28 short-term LBP. Epidemiological studies have reported that LBP could be caused by  
29  
30 combinations of physical factors alone<sup>26</sup>. A cross-sectional study<sup>22</sup> in Taiwan found  
31  
32 that certain manual patient-transfer tasks played important roles in severe LBP (such  
33  
34 as care seeking, intense pain, and sick leave). Tasks that are often performed with  
35  
36 twisted or bent posture or tasks involving heavy lifting have been demonstrated to  
37  
38 cause high spinal stress<sup>27</sup>. Patient handling, as one of the main tasks of nurses, could  
39  
40 generate a severe biomechanical load on spinal parts of the body and could impose  
41  
42 compressive and shear forces on nurses' low spine<sup>28</sup>. In contrast to the ergonomic  
43  
44 factors for chronic LBP among ambulance doctors (frequent bending of the trunk) and  
45  
46 drivers (sitting for long periods of time) and in contrast to the findings of a cohort  
47  
48 study<sup>29</sup> in Norway that showed that prolonged standing and awkward lifting were  
49  
50 important factors of the ergonomic factors for LBP, our study found the frequent  
51  
52  
53  
54  
55  
56  
57  
58  
59  
60

1  
2  
3  
4 bending of the trunk and heavy or awkward lifting contributed to chronic LBP, which  
5  
6 again confirmed the above findings among ambulance nurses. Musculoskeletal loads  
7  
8 and injuries resulting from patient-handling tasks need to be reduced and could be  
9  
10 reduced by efficient and cost-effective ergonomic intervention measures, including  
11  
12 sharing LBP knowledge, transferring equipment, lifting teams and training in safe  
13  
14 patient-transfer techniques reported by previous studies<sup>30</sup>. Therefore, to prevent  
15  
16 chronic LBP among ambulance nurses, ergonomic intervention measures need to be  
17  
18 taken.  
19  
20  
21  
22  
23

24  
25 Psychosocial factors are perceived feelings of the work environment that could  
26  
27 bring about psychological fatigue, job dissatisfaction and occupational stress<sup>31</sup>. Our  
28  
29 study found that high psychological job demand, low job control and low supervisor  
30  
31 support were independently associated with chronic LBP, consistent with the findings  
32  
33 of other studies<sup>27 32-34</sup>. A cross-sectional study<sup>32</sup> in Brazil reported that both physical  
34  
35 and psychosocial work demands were independently associated with LBP. In a  
36  
37 prospective study<sup>33</sup>, an increased risk of hospitalization due to musculoskeletal  
38  
39 disorders and an increased rate of musculoskeletal sickness were reported to be  
40  
41 associated with a lack of job control. In other studies<sup>27 34</sup>, poor job content and low  
42  
43 workplace social support were also shown to be risk factors for back pain. In our  
44  
45 study, workplace co-worker support was noted to be significantly associated with  
46  
47 chronic LBP in the univariate analysis but this association did not remain in the  
48  
49 multivariate logistic regression analysis, probably because the ambulance workers as  
50  
51 a group, worked collaboratively, to some extent, and the factor of co-worker support  
52  
53  
54  
55  
56  
57  
58  
59  
60

1  
2  
3  
4 was not as significantly important as other psychological factors. Our study also  
5  
6 found that psychological fatigue and job satisfaction were all associated with chronic  
7  
8 LBP, consistent with the findings of other studies<sup>35 36</sup> that showed that employees  
9  
10 dissatisfied with their work were more prone to complain of back pain. High  
11  
12 psychological fatigue could not only increase the possibility of worker injuries and  
13  
14 medical errors but could also negatively affect one's physical and mental work  
15  
16 performance<sup>37</sup>. A cohort study<sup>29</sup> of the general working population in Norway  
17  
18 showed that psychosocial factors such as high psychological job demands and low job  
19  
20 control were reported as the most consistent and important predictors of LBP, in  
21  
22 addition to ergonomic factors. Emergency ambulance nursing work not only requires  
23  
24 high-intensity physical activity, but also demands professional skills and rapid  
25  
26 responses in emergencies, which affect individuals' social psychology. Therefore,  
27  
28 negative psychosocial work factors also need to be decreased to an acceptable level to  
29  
30 control chronic LBP among ambulance nurses.  
31  
32  
33  
34  
35  
36  
37  
38  
39  
40  
41  
42

43 We also found that age, sex, BMI and work shift (shift work vs. day work) were  
44  
45 associated with chronic LBP. Another cross-sectional study<sup>38</sup> of 1203 Iranian  
46  
47 petrochemical employees also reported that musculoskeletal disorders were  
48  
49 statistically more prevalent in shift workers than in day workers. In a prospective  
50  
51 study<sup>39</sup> of nurses' aides, LBP-related sick leaves were revealed to be correlated with  
52  
53 working night shifts. Regarding the many risk factors of chronic LBP among  
54  
55 ambulance nurses, one simple intervention measure alone may not be adequate<sup>40</sup>. To  
56  
57  
58  
59  
60



1  
2  
3  
4 achieve the aim of decreasing chronic LBP in ambulance nurses, multi-component  
5  
6 comprehensive measures might be considered in the future.  
7  
8  
9

## 10 11 Conclusions

12  
13 This study suggests a relatively high prevalence of LBP among ambulance nurses.  
14  
15 Psychosocial factors, such as stress and fatigue, and ergonomic factors, such as the  
16  
17 frequent bending of the trunk and heavy or awkward lifting, played important roles in  
18  
19 the development of chronic LBP. Comprehensive intervention measures might be  
20  
21 needed in explorations of prevention methods.  
22  
23  
24  
25  
26  
27  
28  
29

## 30 31 Contributors

32  
33 HD designed the study, participated in the data collection, and drafted and revised  
34  
35 the manuscript. QZ participated in the design of the work, data collection, data  
36  
37 analysis, interpretation of findings and revising the manuscript. CZ and GL  
38  
39 contributed to data collection, interpretation of findings, and revisions. All authors  
40  
41 contributed to the paper revising and final approval of the version to be published.  
42  
43  
44

45 Competing interests None declared.

46  
47 Patient consent Obtained.

48  
49 Ethics approval

50  
51 The study was approved by the Ethics Committee of Shouguang People's Hospital  
52  
53 (2016SD02011).  
54  
55

56  
57 Data sharing statement  
58  
59  
60

1  
2  
3  
4 The raw data used in the study are not publicly available due to ethical restrictions  
5  
6 and privacy protection but are available from the corresponding author on reasonable  
7  
8 request.  
9  
10

## 11 12 13 14 15 16 17 18 19 20 21 22 23 24 25 26 27 28 29 30 31 32 33 34 35 36 37 38 39 40 41 42 43 44 45 46 47 48 49 50 51 52 53 54 55 56 57 58 59 60

### References

1. Sterud T, Ekeberg O, Hem E. Health status in the ambulance services: a systematic review. *BMC Health Serv Res* 2006;6:82. doi: 10.1186/1472-6963-6-82 [published Online First: 2006/07/05]
2. Broniecki M, Esterman A, May E, et al. Musculoskeletal disorder prevalence and risk factors in ambulance officers. *J Back Musculoskelet Rehabil* 2010;23(4):165-74. doi: 10.3233/bmr-2010-0265 [published Online First: 2010/11/17]
3. Sterud T, Hem E, Ekeberg O, et al. Health problems and help-seeking in a nationwide sample of operational Norwegian ambulance personnel. *BMC Public Health* 2008;8:3. doi: 10.1186/1471-2458-8-3 [published Online First: 2008/01/08]
4. Xia T, Collie A. Work-related injury and illness in the Victorian healthcare sector: a retrospective analysis of workers. *Aust Health Rev* 2018 doi: 10.1071/ah18017 [published Online First: 2018/12/06]
5. Hansen CD, Rasmussen K, Kyed M, et al. Physical and psychosocial work environment factors and their association with health outcomes in Danish ambulance personnel - a cross-sectional study. *BMC Public Health* 2012;12:534. doi: 10.1186/1471-2458-12-534 [published Online First: 2012/07/25]
6. Roberts MH, Sim MR, Black O, et al. Occupational injury risk among ambulance officers and paramedics compared with other healthcare workers in Victoria, Australia: analysis of workers' compensation claims from 2003 to 2012. *Occup Environ Med* 2015;72(7):489-95. doi: 10.1136/oemed-2014-102574 [published Online First: 2015/03/18]
7. McDonald M, DiBonaventura M, Ullman S. Musculoskeletal pain in the workforce: the effects of back, arthritis, and fibromyalgia pain on quality of life and work productivity. *J Occup Environ Med* 2011;53(7):765-70. doi: 10.1097/JOM.0b013e318222af81 [published Online First: 2011/06/21]
8. Rodgers LM. A five year study comparing early retirements on medical grounds in ambulance personnel with those in other groups of health service staff. Part II: Causes of retirements. *Occup Med (Lond)* 1998;48(2):119-32. [published Online First: 1998/06/06]
9. Coluci MZ, Alexandria NM. Job factors related to musculoskeletal symptoms among nursing personnel--a review. *Work* 2012;41 Suppl 1:2516-20. doi: 10.3233/wor-2012-0492-2516 [published Online First: 2012/02/10]

10. da Costa BR, Vieira ER. Risk factors for work-related musculoskeletal disorders: A systematic review of recent longitudinal studies. *Am J Ind Med* 2010;53(3):285-323. doi: 10.1002/ajim.20750 [published Online First: 2009/09/16]
11. Ghaffari M, Alipour A, Farshad AA, et al. Effect of psychosocial factors on low back pain in industrial workers. *Occup Med (Lond)* 2008;58(5):341-7. doi: 10.1093/occmed/kqn006 [published Online First: 2008/02/26]
12. Estryng-Behar M, van der Heijden B, Camerino D, et al. Violence risks in nursing--results from the European 'NEXT' Study. *Occup Med (Lond)* 2008;58(2):107-14. doi: 10.1093/occmed/kqm142 [published Online First: 2008/01/24]
13. Kuorinka I, Jonsson B, Kilbom A, et al. Standardised Nordic questionnaires for the analysis of musculoskeletal symptoms. *Appl Ergon* 1987;18(3):233-7. [published Online First: 1987/09/01]
14. Hildebrandt VH, Bongers PM, van Dijk FJ, et al. Dutch Musculoskeletal Questionnaire: description and basic qualities. *Ergonomics* 2001;44(12):1038-55. doi: 10.1080/00140130110087437 [published Online First: 2002/01/10]
15. Li J, Yang W, Liu P, et al. Psychometric evaluation of the Chinese (mainland) version of Job Content Questionnaire: a study in university hospitals. *Ind Health* 2004;42(2):260-7. [published Online First: 2004/05/07]
16. Yang L, Hildebrand V, Yu S, et al. The introduction of a musculoskeletal disorders questionnaire-the questionnaire attached. *Industrial health and occupational diseases* 2009;1:25-31.
17. Du WW, Wang S, Wang JX, et al. [The assessment of reliability and validity of musculoskeletal questionnaire]. *Zhonghua Lao Dong Wei Sheng Zhi Ye Bing Za Zhi* 2012;30(5):335-8. [published Online First: 2012/07/19]
18. Yu S, Lu ML, Gu G, et al. Musculoskeletal symptoms and associated risk factors in a large sample of Chinese workers in Henan province of China. *Am J Ind Med* 2012;55(3):281-93. doi: 10.1002/ajim.21037 [published Online First: 2011/11/30]
19. van Tulder M, Becker A, Bekkering T, et al. Chapter 3. European guidelines for the management of acute nonspecific low back pain in primary care. *Eur Spine J* 2006;15 Suppl 2:S169-91. doi: 10.1007/s00586-006-1071-2 [published Online First: 2006/03/22]
20. Alexopoulos EC, Burdorf A, Kalokerinou A. A comparative analysis on musculoskeletal disorders between Greek and Dutch nursing personnel. *Int Arch Occup Environ Health* 2006;79(1):82-8. doi: 10.1007/s00420-005-0033-z [published Online First: 2005/09/01]
21. Sharma S, Shrestha N, Jensen MP. Pain-related factors associated with lost work days in nurses with low back pain: A cross-sectional study. *Scand J Pain* 2016;11:36-41. doi: 10.1016/j.sjpain.2015.11.007 [published Online First: 2016/04/01]
22. Feng CK, Chen ML, Mao IF. Prevalence of and risk factors for different measures of low back pain among female nursing aides in Taiwanese nursing homes. *BMC Musculoskelet Disord* 2007;8:52. doi: 10.1186/1471-2474-8-52 [published Online First: 2007/06/27]
23. Sadeghian F, Hosseinzadeh S, Aliyari R. Do Psychological Factors Increase the Risk for Low Back Pain Among Nurses? A Comparing According to Cross-sectional and Prospective Analysis. *Saf Health Work* 2014;5(1):13-6. doi: 10.1016/j.shaw.2013.11.004 [published Online First: 2014/06/17]
24. Scott NA, Moga C, Harstall C. Managing low back pain in the primary care setting: the know-do

- gap. *Pain Res Manag* 2010;15(6):392-400. [published Online First: 2010/12/18]
25. European guidelines for the management of low back pain. *Acta Orthop Scand Suppl* 2002;73(305):20-5. [published Online First: 2003/01/28]
26. Punnett L, Pruss-Utun A, Nelson DI, et al. Estimating the global burden of low back pain attributable to combined occupational exposures. *Am J Ind Med* 2005;48(6):459-69. doi: 10.1002/ajim.20232 [published Online First: 2005/11/22]
27. Warming S, Precht DH, Suadicani P, et al. Musculoskeletal complaints among nurses related to patient handling tasks and psychosocial factors--based on logbook registrations. *Appl Ergon* 2009;40(4):569-76. doi: 10.1016/j.apergo.2008.04.021 [published Online First: 2008/09/16]
28. Jager M, Jordan C, Theilmeier A, et al. Lumbar-load analysis of manual patient-handling activities for biomechanical overload prevention among healthcare workers. *Ann Occup Hyg* 2013;57(4):528-44. doi: 10.1093/annhyg/mes088 [published Online First: 2012/12/21]
29. Sterud T, Tynes T. Work-related psychosocial and mechanical risk factors for low back pain: a 3-year follow-up study of the general working population in Norway. *Occup Environ Med* 2013;70(5):296-302. doi: 10.1136/oemed-2012-101116 [published Online First: 2013/01/17]
30. Hodder JN, MacKinnon SN, Ralhan A, et al. Effects of training and experience on patient transfer biomechanics. *International Journal of Industrial Ergonomics* 2010;40(3):282-88. doi: <https://doi.org/10.1016/j.ergon.2010.01.007>
31. Huang GD, Feuerstein M, Sauter SL. Occupational stress and work-related upper extremity disorders: concepts and models. *Am J Ind Med* 2002;41(5):298-314. doi: 10.1002/ajim.10045 [published Online First: 2002/06/20]
32. Fernandes Rde C, Carvalho FM, Assuncao AA, et al. Interactions between physical and psychosocial demands of work associated to low back pain. *Rev Saude Publica* 2009;43(2):326-34. [published Online First: 2009/03/17]
33. Yip VY. New low back pain in nurses: work activities, work stress and sedentary lifestyle. *J Adv Nurs* 2004;46(4):430-40. doi: 10.1111/j.1365-2648.2004.03009.x [published Online First: 2004/05/01]
34. Louw QA, Morris LD, Grimmer-Somers K. The prevalence of low back pain in Africa: a systematic review. *BMC Musculoskelet Disord* 2007;8:105. doi: 10.1186/1471-2474-8-105 [published Online First: 2007/11/03]
35. Jones AY, Lee RY. Cardiopulmonary resuscitation and back injury in ambulance officers. *Int Arch Occup Environ Health* 2005;78(4):332-6. doi: 10.1007/s00420-004-0577-3 [published Online First: 2005/04/14]
36. From the Centers for Disease Control and Prevention. Ambulance crash-related injuries among Emergency Medical Services workers--United States, 1991-2002. *JAMA* 2003;289(13):1628-9. doi: 10.1001/jama.289.13.1628 [published Online First: 2003/04/04]
37. Barker LM, Nussbaum MA. The effects of fatigue on performance in simulated nursing work. *Ergonomics* 2011;54(9):815-29. doi: 10.1080/00140139.2011.597878 [published Online First: 2011/08/23]
38. Choobineh A, Soltanzadeh A, Tabatabaee H, et al. Health effects associated with shift work in 12-hour shift schedule among Iranian petrochemical employees. *Int J Occup Saf Ergon* 2012;18(3):419-27. doi: 10.1080/10803548.2012.11076937 [published Online First: 2012/09/22]
39. Eriksen W, Bruusgaard D, Knardahl S. Work factors as predictors of intense or disabling low back

1  
2  
3 pain; a prospective study of nurses' aides. *Occup Environ Med* 2004;61(5):398-404.  
4 [published Online First: 2004/04/20]  
5

- 6 40. Tullar JM, Brewer S, Amick BC, 3rd, et al. Occupational safety and health interventions to reduce  
7 musculoskeletal symptoms in the health care sector. *J Occup Rehabil* 2010;20(2):199-219. doi:  
8 10.1007/s10926-010-9231-y [published Online First: 2010/03/12]  
9

10  
11  
12  
13  
14  
15  
16  
17  
18  
19  
20  
21  
22  
23  
24  
25  
26  
27  
28  
29  
30  
31  
32  
33  
34  
35  
36  
37  
38  
39  
40  
41  
42  
43  
44  
45  
46  
47  
48  
49  
50  
51  
52  
53  
54  
55  
56  
57  
58  
59  
60

For peer review only

1  
2  
3  
4  
5  
6  
7  
8  
9  
10  
11  
12  
13  
14  
15  
16  
17  
18  
19  
20  
21  
22  
23  
24  
25  
26  
27  
28  
29  
30  
31  
32  
33  
34  
35  
36  
37  
38  
39  
40  
41  
42  
43  
44  
45  
46  
47  
48  
49  
50  
51  
52  
53  
54  
55  
56  
57  
58  
59  
60STROBE Statement—Checklist of items that should be included in reports of *cross-sectional studies*

|                           | Item No | Recommendation                                                                                                                                                                                    | Page No    |
|---------------------------|---------|---------------------------------------------------------------------------------------------------------------------------------------------------------------------------------------------------|------------|
| <b>Title and abstract</b> | 1       | (a) Indicate the study's design with a commonly used term in the title or the abstract                                                                                                            | 2          |
|                           |         | (b) Provide in the abstract an informative and balanced summary of what was done and what was found                                                                                               | 2-3        |
| <b>Introduction</b>       |         |                                                                                                                                                                                                   |            |
| Background/rationale      | 2       | Explain the scientific background and rationale for the investigation being reported                                                                                                              | 4-5        |
| Objectives                | 3       | State specific objectives, including any prespecified hypotheses                                                                                                                                  | 4-5        |
| <b>Methods</b>            |         |                                                                                                                                                                                                   |            |
| Study design              | 4       | Present key elements of study design early in the paper                                                                                                                                           | 6          |
| Setting                   | 5       | Describe the setting, locations, and relevant dates, including periods of recruitment, exposure, follow-up, and data collection                                                                   | 6-7        |
| Participants              | 6       | (a) Give the eligibility criteria, and the sources and methods of selection of participants                                                                                                       | 6          |
| Variables                 | 7       | Clearly define all outcomes, exposures, predictors, potential confounders, and effect modifiers. Give diagnostic criteria, if applicable                                                          | 7-8        |
| Data sources/measurement  | 8*      | For each variable of interest, give sources of data and details of methods of assessment (measurement). Describe comparability of assessment methods if there is more than one group              | 8-9        |
| Bias                      | 9       | Describe any efforts to address potential sources of bias                                                                                                                                         | 8-9        |
| Study size                | 10      | Explain how the study size was arrived at                                                                                                                                                         | 6          |
| Quantitative variables    | 11      | Explain how quantitative variables were handled in the analyses. If applicable, describe which groupings were chosen and why                                                                      | 8-9        |
| Statistical methods       | 12      | (a) Describe all statistical methods, including those used to control for confounding                                                                                                             | 8-9        |
|                           |         | (b) Describe any methods used to examine subgroups and interactions                                                                                                                               | 8-9        |
|                           |         | (c) Explain how missing data were addressed                                                                                                                                                       | 9, results |
|                           |         | (d) If applicable, describe analytical methods taking account of sampling strategy                                                                                                                | 6          |
|                           |         | (e) Describe any sensitivity analyses                                                                                                                                                             | 8-9        |
| <b>Results</b>            |         |                                                                                                                                                                                                   |            |
| Participants              | 13*     | (a) Report numbers of individuals at each stage of study—eg numbers potentially eligible, examined for eligibility, confirmed eligible, included in the study, completing follow-up, and analysed | 9          |
|                           |         | (b) Give reasons for non-participation at each stage                                                                                                                                              | 6, 9       |
|                           |         | (c) Consider use of a flow diagram                                                                                                                                                                | no         |
| Descriptive data          | 14*     | (a) Give characteristics of study participants (eg demographic, clinical, social) and information on exposures and potential confounders                                                          | 9-10       |
|                           |         | (b) Indicate number of participants with missing data for each variable of interest                                                                                                               | 9          |
| Outcome data              | 15*     | Report numbers of outcome events or summary measures                                                                                                                                              | 9-10       |
| Main results              | 16      | (a) Give unadjusted estimates and, if applicable, confounder-adjusted estimates and their precision (eg, 95% confidence interval). Make clear                                                     | 10-14      |

|                          |    |                                                                                                                                                                            |               |
|--------------------------|----|----------------------------------------------------------------------------------------------------------------------------------------------------------------------------|---------------|
|                          |    | which confounders were adjusted for and why they were included                                                                                                             |               |
|                          |    | (b) Report category boundaries when continuous variables were categorized                                                                                                  | 10-11, tables |
|                          |    | (c) If relevant, consider translating estimates of relative risk into absolute risk for a meaningful time period                                                           | no            |
| Other analyses           | 17 | Report other analyses done—eg analyses of subgroups and interactions, and sensitivity analyses                                                                             | 14            |
| <b>Discussion</b>        |    |                                                                                                                                                                            |               |
| Key results              | 18 | Summarise key results with reference to study objectives                                                                                                                   | 15-16         |
| Limitations              | 19 | Discuss limitations of the study, taking into account sources of potential bias or imprecision. Discuss both direction and magnitude of any potential bias                 | 16            |
| Interpretation           | 20 | Give a cautious overall interpretation of results considering objectives, limitations, multiplicity of analyses, results from similar studies, and other relevant evidence | 16-19         |
| Generalisability         | 21 | Discuss the generalisability (external validity) of the study results                                                                                                      | 15-16         |
| <b>Other information</b> |    |                                                                                                                                                                            |               |
| Funding                  | 22 | Give the source of funding and the role of the funders for the present study and, if applicable, for the original study on which the present article is based              | 1, title page |

\*Give information separately for exposed and unexposed groups.

**Note:** An Explanation and Elaboration article discusses each checklist item and gives methodological background and published examples of transparent reporting. The STROBE checklist is best used in conjunction with this article (freely available on the Web sites of PLoS Medicine at <http://www.plosmedicine.org/>, Annals of Internal Medicine at <http://www.annals.org/>, and Epidemiology at <http://www.epidem.com/>). Information on the STROBE Initiative is available at [www.strobe-statement.org](http://www.strobe-statement.org).

# BMJ Open

## Low back pain in emergency ambulance workers in tertiary hospitals in China and its risk factors among ambulance nurses: a cross-sectional study

|                                 |                                                                                                                                                                                    |
|---------------------------------|------------------------------------------------------------------------------------------------------------------------------------------------------------------------------------|
| Journal:                        | <i>BMJ Open</i>                                                                                                                                                                    |
| Manuscript ID                   | bmjopen-2019-029264.R2                                                                                                                                                             |
| Article Type:                   | Original research                                                                                                                                                                  |
| Date Submitted by the Author:   | 19-Aug-2019                                                                                                                                                                        |
| Complete List of Authors:       | Zhang, Qiong; Shouguang People's Hospital<br>Dong, Hongyun; Shouguang People's Hospital<br>Zhu, Chunji; Shouguang People's Hospital<br>Liu, Guangzeng; Shouguang People's Hospital |
| <b>Primary Subject Heading</b>: | Occupational and environmental medicine                                                                                                                                            |
| Secondary Subject Heading:      | Occupational and environmental medicine, Public health                                                                                                                             |
| Keywords:                       | low back pain, ambulance, nurse, OCCUPATIONAL & INDUSTRIAL MEDICINE                                                                                                                |
|                                 |                                                                                                                                                                                    |

SCHOLARONE™  
Manuscripts



**Title page****Title**

Low back pain in emergency ambulance workers in tertiary hospitals in China and its risk factors among ambulance nurses: a cross-sectional study

**Complete names (full first and last)**

Qiong Zhang; Hongyun Dong; Chunji Zhu; Guangzeng Liu

**The affiliation and address of all the authors**

Shouguang People's Hospital. Shouguang People's Hospital, NO. 45 Jiankang Street, Shouguang, Weifang, Shandong Province, China. 262700

**The e-mail address, and telephone number of the corresponding author**

ayouwang@163.com , 8615006697150

**Acknowledgements:** None.

**Competing interests statement:** None declared.

**Funding:** This research received no specific grant from any funding agencies in the public, commercial, or not-for-profit sectors.

1  
2  
3  
4 Low back pain in emergency ambulance workers in tertiary hospitals in China and  
5  
6 its risk factors among ambulance nurses: a cross-sectional study  
7  
8  
9  
10

## 11 **Abstract**

### 12 **Objective**

13  
14  
15 Low back pain (LBP) could cause serious consequences and has been shown to be  
16  
17 prevalent among emergency ambulance workers. Studies on the prevalence of and  
18  
19 risk factors for LBP among emergency ambulance workers are scarce in China. The  
20  
21 study aimed to determine the prevalence of LBP among ambulance workers,  
22  
23 including doctors, nurses, and drivers, and to explore the risk factors for ambulance  
24  
25 nurses' chronic LBP (lasting for at least three months).  
26  
27  
28  
29  
30  
31

### 32 **Design**

33  
34 Cross-sectional study.  
35  
36

### 37 **Setting**

38  
39 Emergency ambulance systems from 38 tertiary hospitals in Shandong, China were  
40  
41 selected by random cluster sampling.  
42  
43  
44

### 45 **Participants**

46  
47 A total of 1560 ambulance workers completed the study.  
48  
49

### 50 **Outcome measures**

51  
52 A paper-based questionnaire that included the Nordic Musculoskeletal  
53  
54 Questionnaire, which evaluated LBP, the Dutch Musculoskeletal Questionnaire,  
55  
56 which assessed ergonomic factors, and the Job Content Questionnaire, which assessed  
57  
58  
59  
60

1  
2  
3  
4 stress, was used. Multivariate logistic regression analysis was conducted to quantify  
5  
6 the association of potential risk factors with chronic LBP among ambulance nurses.  
7  
8

### 9 **Results**

10  
11 The one-year prevalence of LBP lasting for at least 24 hours, seven days and three  
12 months was 86.1%, 50.6% and 21.1%, respectively, among 498 ambulance nurses;  
13  
14 70.5%, 36.4% and 15.8% among 519 doctors; and 57.5%, 23.8% and 12.3% among  
15  
16 543 drivers. The factors contributing to chronic LBP among ambulance nurses were  
17  
18 the frequent bending of the trunk, heavy or awkward lifting, shift work, low job  
19  
20 satisfaction, high psychological fatigue, high psychological job demand, low job  
21  
22 control, low supervisor support, older age, female sex and obesity.  
23  
24  
25  
26  
27  
28  
29

### 30 **Conclusions**

31  
32 LBP was more prevalent among ambulance nurses than among ambulance doctors  
33  
34 and drivers. Many factors, especially psychosocial and ergonomic factors, contributed  
35  
36 to ambulance nurses' chronic LBP. Comprehensive measures might be needed to  
37  
38 control LBP.  
39  
40  
41  
42  
43  
44  
45

### 46 **Strengths and limitations of this study**

47  
48 This is the first large-scale study on the prevalence of low back pain (LBP) among  
49  
50 emergency ambulance workers and risk factors for ambulance nurses' LBP in China.  
51  
52

53  
54 Various factors, including individual, psychosocial, ergonomic and organizational  
55  
56 factors, were collected and analysed in the study.  
57

58  
59 The cross-sectional design and subjective measures of the study limited the  
60

1  
2  
3  
4 establishment of causal directions.  
5

6 Those subjects having left ambulance position due to LBP were not included in the  
7  
8 study, which might underestimate the prevalence of LBP and the extent of its risk  
9  
10 factors.  
11  
12  
13

### 14 15 16 17 **Keywords**

18 low back pain; ambulance workers; nurse  
19  
20  
21  
22

### 23 24 25 **Introduction**

26  
27  
28  
29  
30 Emergency ambulance service, as an essential part of the healthcare system,  
31  
32 provides pre-hospital medical emergency service for patients, including carrying,  
33  
34 moving and transporting patients to an emergency centre and treating them in the  
35  
36 ambulance, such as performing cardiopulmonary resuscitation. Ambulance workers  
37  
38 have been reported to experience more musculoskeletal disorders than the general  
39  
40 workforce <sup>1-4</sup>. In Denmark, data from a nationwide study showed that a substantially  
41  
42 high proportion (42%) of 1689 ambulance personnel reported musculoskeletal pain,  
43  
44 which was significantly higher than corresponding reports from the core workforce of  
45  
46 14,175 individuals (29%) <sup>5</sup>. In Australia, ambulance officers and paramedics had the  
47  
48 highest rates for musculoskeletal injury compared with other healthcare workers in  
49  
50 the 2003-2012 time period <sup>6</sup>. Worldwide, attention has been paid to the  
51  
52 musculoskeletal disorders of ambulance workers over the last decade because of  
53  
54  
55  
56  
57  
58  
59  
60

1  
2  
3  
4 serious consequences, such as reduced quality of life, loss of working days,  
5  
6 occupational disability and the need to change and/or leave a profession <sup>7</sup> . Due to  
7  
8 musculoskeletal disorders, especially low back pain (LBP), ambulance workers have  
9  
10 been reported to suffer from a higher standardized early retirement than other  
11  
12 healthcare providers and the general workforce <sup>1 8</sup> . In mainland China, scarce  
13  
14 attention has been paid to emergency ambulance workers, and no study thus far has  
15  
16 explored the prevalence of LBP among ambulance workers and their risk factors.  
17  
18  
19  
20  
21  
22  
23  
24

25 Studies <sup>9-11</sup> have reported that many factors could contribute to LBP, including  
26  
27 individual, psychosocial, physical and organizational work factors. Psychosocial  
28  
29 factors, including low job support, job dissatisfaction, and occupational stress, and  
30  
31 individual factors, such as high BMI and being female, could contribute to  
32  
33 musculoskeletal disorders of the back region, as revealed by a systematic review with  
34  
35 strong evidence<sup>12</sup>. However, regarding the LBP among a special occupational group,  
36  
37 the above factors do not have the same effects. Psychosocial factors at work, such as  
38  
39 stress, fatigue and job dissatisfaction, have been demonstrated to largely contribute to  
40  
41 the development of LBP in a follow-up study of 4500 Iranian industrial workers <sup>13</sup> .  
42  
43  
44  
45  
46  
47  
48 Emergency ambulance workers, especially nurses, are faced with demanding nursing  
49  
50 skills, rapid pace of work, episodes of violence, threats, increased risks of contracting  
51  
52 infectious diseases and increasing demands on medical competence <sup>14-18</sup> . Therefore,  
53  
54 ambulance nurses may also suffer from LBP resulting from psychosocial factors, and  
55  
56 this effect is not well known. Besides, in mainland China, during the process of  
57  
58  
59  
60

1  
2  
3  
4 transporting patients to emergency center, most often, ambulance nurse needs to do  
5  
6 the lifting, sometimes with the help of ambulance doctor while ambulance driver is  
7  
8 only responsible for driving the ambulance vehicle, which might contribute to  
9  
10 prevalence variance of LBP among ambulance workers. The current study aimed to  
11  
12 evaluate the prevalence of LBP among ambulance workers in different work positions  
13  
14 and to determine and quantify the association between influencing factors, including  
15  
16 individual, physical and psychosocial factors, and chronic LBP (lasting for at least  
17  
18 three months) among ambulance nurses.  
19  
20  
21  
22  
23  
24  
25  
26

## 27 **Methods**

28  
29 A cross-sectional survey was implemented from September to November 2018.  
30  
31 The study was approved by the Ethics Committee of Shouguang People's Hospital.  
32  
33 Informed consent was obtained before the participants were invited to participate.  
34  
35  
36  
37  
38  
39

## 40 **Participants**

41  
42 Given the prevalence of LBP, the number of independent variables in the logistic  
43  
44 regression and the response rate, 38 hospitals were selected first by random cluster  
45  
46 sampling from among all the tertiary hospitals (182 tertiary-level hospitals in total) in  
47  
48 Shandong, China. Then, of the selected 38 hospitals, all the emergency ambulance  
49  
50 workers who had at least one year of work experience in this job were invited to  
51  
52 participate in collaboration with the the management departments and the directors of  
53  
54 emergency departments. The exclusion criteria were as follows: part-time workers or  
55  
56  
57  
58  
59  
60

1  
2  
3  
4 workers who had experienced trauma, injury, or serious diseases. A total of 1560  
5  
6 ambulance workers (498 nurses, 519 doctors and 543 drivers) completed our  
7  
8 questionnaire, and the response rate of the study was 90.8%.  
9  
10

### 11 12 13 14 Questionnaire

15  
16 A self-administered questionnaire that included the Standardized Nordic  
17  
18 Musculoskeletal Questionnaire<sup>19</sup>, the Dutch Musculoskeletal Questionnaire<sup>20</sup> and the  
19  
20 Job Content Questionnaire<sup>21</sup>, was revised after a pilot study. The paper-based  
21  
22 questionnaire consisted of four sections. Section one addresses demographic  
23  
24 information, including age, sex, height, weight, marital status, smoking, alcohol  
25  
26 consumption, educational level, marital status, the presence of the children at home  
27  
28 and exercise.  
29  
30  
31  
32  
33

34  
35 Section two was a modified version of the Standardized Nordic Musculoskeletal  
36  
37 Questionnaire. The participants were asked whether they had suffered from pain or  
38  
39 discomfort in the low back region lasting for at least 24 hours, seven days and three  
40  
41 months in the preceding twelve months. If a participant reported LBP lasting for at  
42  
43 least three months in the past twelve months, he or she was considered to have  
44  
45 chronic LBP<sup>22</sup>. The Chinese version of the Nordic questionnaire has been widely  
46  
47 used, validated and contextualized by previous national studies according to a  
48  
49 cross-cultural understanding of the Chinese population<sup>23-25</sup>.  
50  
51  
52  
53  
54  
55  
56  
57

58 Section three addresses work information and ergonomic factors mainly derived  
59  
60

1  
2  
3  
4 from Dutch Musculoskeletal Questionnaire<sup>20</sup>, which has been systematically  
5  
6 translated into Chinese<sup>23</sup> and validated<sup>24</sup>. Ergonomic factors, which were directly  
7  
8 selected from the Chinese version Dutch Musculoskeletal Questionnaire, were  
9  
10 measured using a dichotomous scale (yes/no), and the assessment of risk factors was  
11  
12 qualitative in this study<sup>20,23</sup>. Participants were asked whether they were often exposed  
13  
14 to the ergonomic risk factors during their work. Work information included work  
15  
16 position (doctor, nurse, or driver), shift work or day work, work experience and  
17  
18 employment status (permanent vs. temporary/contract).  
19  
20  
21  
22  
23

24 Section four addresses psychosocial factors, including job satisfaction (high,  
25  
26 medium, low), self-perceived health status (very good, generally good, generally bad,  
27  
28 very bad), psychological fatigue (low, medium, high) and occupational stress assessed  
29  
30 by the Job Content Questionnaire (JCQ), which has been widely used in different  
31  
32 groups of numerous studies and has shown good reliability and validity in the Chinese  
33  
34 working population<sup>21</sup>. In our study, 22 items of the original 49-item JCQ were  
35  
36 applied and consisted of three dimensions: psychological job demand (five items); job  
37  
38 control, including skill discretion (six items), decision-making authority (three items);  
39  
40 and workplace social support, including supervisor social support (four items) and  
41  
42 co-worker social support (four items). Each item was scored on a four-point Likert  
43  
44 scale from “strongly disagree” to “strongly agree”, with higher scores indicating  
45  
46 higher psychological job demand, job control and workplace social support. In this  
47  
48 study, Cronbach’s  $\alpha$  coefficients for psychological job demand, job control and  
49  
50 workplace social support were 0.79, 0.87 and 0.90, respectively. The validity of the  
51  
52  
53  
54  
55  
56  
57  
58  
59  
60



1  
2  
3  
4 Chinese version JCQ has been confirmed in previous Chinese studies <sup>21</sup>.  
5  
6  
7

#### 8 9 Data analysis

10  
11 The SPSS, version 18.0, was used to perform statistical analysis. A single-factor  
12  
13  
14 chi-square test, independent t-test, or rank-sum test was used to examine the  
15  
16  
17 differences between different groups of participants. The association of physical,  
18  
19 psychosocial, organizational and individual factors with chronic LBP (lasting for at  
20  
21  
22 least three months) was first examined with univariate analysis. The significant  
23  
24  
25 factors selected at the *p*-value of 0.25 in the univariate analysis were then entered into  
26  
27  
28 multivariate logistic regression analysis. Odds ratios (ORs) and 95% confidence  
29  
30  
31 intervals (95% CI) were calculated to evaluate the effect of risk factors on chronic  
32  
33  
34 LBP. To avoid an inaccurate and unstable logistic regression model, the significant  
35  
36  
37 variable 'work experience' in the univariate analysis was removed, and 'age' was kept  
38  
39  
40 for the multivariate analysis, as it showed collinearity in relationships ( $\rho > 0.6$ )  
41  
42  
43 diagnosed by Spearman correlation matrix. The statistics for variable entry and  
44  
45  
46 removal were set at  $P < 0.05$  and  $P > 0.1$ , respectively, in the multivariate analysis.  
47  
48  
49 And the multivariate logistic regression analysis was also conducted separately in  
50  
51  
52 ambulance doctors and drivers, in addition to ambulance nurses. A 0.05 statistical  
53  
54  
55 significance level was set for all tests.

#### 56 57 Patient and public involvement

58  
59 No patients or members of the public were involved in the design or  
60  
implementation of the study. The results of the study were disseminated to the health

1  
2  
3  
4 authorities and the selected 38 hospitals.  
5  
6  
7

## 8 9 **Results**

10  
11 All 1560 participants (498 ambulance nurses, 519 doctors and 543 drivers) were  
12 included in the study, and with respect to the questionnaires that were not fully  
13  
14 included in the study, and with respect to the questionnaires that were not fully  
15  
16 completed, the participants were contacted again and completed them later.  
17

18  
19 Approximately 158 individuals (65 ambulance nurses, 49 doctors and 44 drivers)  
20  
21 failed to participate in the survey due to long leaves for vacation, sick leave, maternity  
22  
23 leave and personal affairs.  
24  
25

26  
27 The mean age of the 498 ambulance nurses was  $31.1 \pm 7.6$  years, which was  
28  
29 significantly younger than ambulance doctors ( $35.7 \pm 6.9$ ) and drivers ( $38.4 \pm 9.5$ ). Most  
30  
31 of the ambulance nurses were female, while most of the ambulance doctors and  
32  
33 drivers were male. Most nurses never smoked. Ambulance nurses had significantly  
34  
35 less work experience as an ambulance worker ( $8.3 \pm 8.0$  years) than did ambulance  
36  
37 doctors ( $12.8 \pm 9.3$  years) and drivers ( $14.5 \pm 8.8$  years). Ambulance nurses had an  
38  
39 educational level that was significantly higher than that of drivers and lower than that  
40  
41 of doctors, and the rank-sum test is shown in Table 1. Nurses exercised less than  
42  
43 doctors, and the rank-sum test is shown in Table 1. Nurses exercised less than  
44  
45 doctors and drivers did in their leisure time (Table 1).  
46  
47  
48  
49

50  
51 The twelve-month prevalence of LBP lasting for at least 24 hours, seven days and  
52  
53 three months was 86.1%, 50.6% and 21.1%, respectively, among ambulance nurses;  
54  
55 70.5%, 36.4% and 15.8% among doctors; and 57.5%, 23.8% and 12.3% among  
56  
57 drivers. For more details, see Table 1.  
58  
59  
60

Table 1 Characteristics of emergency ambulance workers in tertiary hospitals

|                                                             | Nurses      | Doctors     | <i>P</i> <sup>a</sup> | Drivers     | <i>P</i> <sup>b</sup> |
|-------------------------------------------------------------|-------------|-------------|-----------------------|-------------|-----------------------|
| Total number of subjects                                    | 498         | 519         |                       | 543         |                       |
| Age (years) <sup>c</sup>                                    | 31.1±7.6    | 35.7±6.9    | <0.001*               | 38.4±9.5    | <0.001*               |
| Sex                                                         |             |             | <0.001†               |             | <0.001†               |
| Male                                                        | 73 (14.7%)  | 396 (76.3%) |                       | 471 (86.7%) |                       |
| Female                                                      | 425 (85.3%) | 123 (23.7%) |                       | 72 (13.3%)  |                       |
| BMI                                                         |             |             | 0.009‡                |             | <0.001‡               |
| < 18.5 (Underweight)                                        | 43 (8.6%)   | 45 (8.7%)   |                       | 21 (3.9%)   |                       |
| 18.5~23.9 (Normal weight)                                   | 276 (55.4%) | 249 (48.0%) |                       | 291 (53.6%) |                       |
| 24.0~27.9 (Overweight)                                      | 125 (25.1%) | 129 (24.9%) |                       | 93 (17.1%)  |                       |
| ≥ 28.0 (Obesity)                                            | 54 (10.8%)  | 96 (18.5%)  |                       | 138 (25.4%) |                       |
| Marital status                                              |             |             | <0.001†               |             | <0.001†               |
| Never married                                               | 75 (15.1%)  | 91 (17.5%)  |                       | 32 (5.9%)   |                       |
| Married/cohabiting                                          | 363 (72.9%) | 402 (77.5%) |                       | 471 (86.7%) |                       |
| Divorced/separated/widowed                                  | 60 (12.0%)  | 26 (5.0%)   |                       | 40 (7.4%)   |                       |
| Smoking                                                     |             |             | <0.001†               |             | <0.001†               |
| Never smoked                                                | 485 (97.4%) | 159 (30.6%) |                       | 75 (13.8%)  |                       |
| Ex-smoker                                                   | 10 (2.0%)   | 147 (28.3%) |                       | 111 (20.4%) |                       |
| Current smoker                                              | 3 (0.6%)    | 213 (41.0%) |                       | 357 (65.7%) |                       |
| Work experience as an ambulance worker (years) <sup>c</sup> | 8.3±8.0     | 12.8±9.3    | <0.001*               | 14.5±8.8    | <0.001*               |
| Educational level                                           |             |             | <0.001‡               |             | <0.001‡               |
| Lower than junior college                                   | 111 (22.3%) | 33 (6.4%)   |                       | 539 (99.3%) |                       |
| Junior college                                              | 261 (52.4%) | 96 (18.5%)  |                       | 3 (0.6%)    |                       |
| Bachelor                                                    | 96 (19.3%)  | 258 (49.7%) |                       | 1 (0.2%)    |                       |
| Master or above                                             | 30 (6.0%)   | 132 (25.4%) |                       | 0 (0.0%)    |                       |
| Exercise in leisure time                                    |             |             | <0.001‡               |             | <0.001‡               |
| Never/almost never                                          | 295 (59.2%) | 198 (38.2%) |                       | 219 (40.3%) |                       |
| Sometimes                                                   | 97 (19.5%)  | 185 (35.6%) |                       | 159 (29.3%) |                       |
| Often                                                       | 106 (21.3%) | 136 (26.2%) |                       | 165 (30.4%) |                       |
| LBP lasting for at least                                    |             |             |                       |             |                       |
| 24 hours                                                    | 429(86.1%)  | 366(70.5%)  | <0.001†               | 312(57.5%)  | <0.001†               |
| 7 days                                                      | 252(50.6%)  | 189(36.4%)  | <0.001†               | 129(23.8%)  | <0.001†               |
| 3 months                                                    | 105(21.1%)  | 82(15.8%)   | 0.030†                | 67(12.3%)   | <0.001†               |

a: P value between ambulance nurses and doctors, b: P value between ambulance nurses and

drivers, c: mean± standard deviation; \*t-test, †Chi-square test, ‡Rank-sum test.

Ambulance nurses who were older in age, were female, had higher BMI, performed shift work, and had worked longer as an ambulance worker and in temporary/contract employment seemed to suffer from chronic LBP more. Regarding ergonomic factors, walking for long periods of time, the frequent bending of the trunk, heavy or awkward lifting, bending or twisting the neck and maintaining shoulder abduction for long periods of time were all statistically associated with chronic LBP. For more details, see Table 2.

Table 2 Univariate analysis of individual and ergonomic factors with chronic LBP among ambulance nurses.

| Factors                                                     | Chronic LBP | Non-chronic-LBP | <i>P</i>            |
|-------------------------------------------------------------|-------------|-----------------|---------------------|
| Number of subjects                                          | 105         | 393             |                     |
| Age (years) <sup>a</sup>                                    | 36.5±7.7    | 29.7±6.7        | <0.001*             |
| Sex                                                         |             |                 | 0.022 <sup>†</sup>  |
| Male                                                        | 8           | 65              |                     |
| Female                                                      | 97          | 328             |                     |
| BMI                                                         |             |                 | <0.001 <sup>‡</sup> |
| < 18.5 (Underweight)                                        | 4           | 39              |                     |
| 18.5~23.9 (Normal weight)                                   | 45          | 231             |                     |
| 24.0~27.9 (Overweight)                                      | 29          | 96              |                     |
| ≥ 28.0 (Obesity)                                            | 27          | 27              |                     |
| Whether takes shift work?                                   |             |                 | <0.001 <sup>†</sup> |
| Yes (Shift work)                                            | 60          | 129             |                     |
| No (Day work)                                               | 45          | 264             |                     |
| Work experience as an ambulance worker (years) <sup>a</sup> | 13.8±8.7    | 6.8±7.2         | <0.001*             |
| Employment status                                           |             |                 | 0.014 <sup>†</sup>  |
| Permanent                                                   | 39          | 199             |                     |
| Temporary/contract                                          | 66          | 194             |                     |
| Ergonomic factors                                           |             |                 |                     |
| Walking for long periods of time (Yes/No)                   | 54/51       | 154/239         | 0.024 <sup>†</sup>  |
| Frequent bending of the trunk (Yes/No)                      | 66/39       | 93/300          | <0.001 <sup>†</sup> |
| Heavy or awkward lifting (Yes/No)                           | 75/30       | 112/281         | <0.001 <sup>†</sup> |
| Bending or twisting the neck (Yes/No)                       | 39/66       | 97/296          | 0.011 <sup>†</sup>  |
| Maintaining shoulder abduction for long periods of          | 48/57       | 136/257         | 0.036 <sup>†</sup>  |

time (Yes/No)

a: mean± standard deviation; \*t-test, †Chi-square test, ‡Rank-sum test.

Regarding the psychosocial factors, scores on psychological job demand were positively associated with chronic LBP, while scores on skill discretion, decision-making authority, workplace supervisor support and co-worker support were negatively associated with chronic LBP among ambulance nurses. Univariate analysis also showed that self-perceived health status, job satisfaction and psychological fatigue were all associated with chronic LBP. For more details, see Table 3.

Table 3 Univariate analysis of psychosocial factors with chronic LBP among ambulance nurses.

| Psychosocial factors                   | Chronic LBP | Non-chronic-LBP | <i>P</i> |
|----------------------------------------|-------------|-----------------|----------|
| Number of subjects                     | 105         | 393             |          |
| Occupational stress                    |             |                 |          |
| Psychological job demand <sup>a</sup>  | 14.5±4.1    | 11.1±3.2        | <0.001*  |
| Decision-making authority <sup>a</sup> | 5.8±3.8     | 8.1±2.5         | <0.001*  |
| Skill discretion <sup>a</sup>          | 11.7±5.3    | 16.2±4.6        | <0.001*  |
| Supervisor social support <sup>a</sup> | 6.8±3.2     | 9.8±2.2         | <0.001*  |
| Coworker social support <sup>a</sup>   | 8.7±3.8     | 10.3±2.6        | <0.001*  |
| Health status self-perceived           |             |                 | 0.043‡   |
| Very good                              | 19          | 89              |          |
| Generally good                         | 25          | 109             |          |
| Generally bad                          | 29          | 117             |          |
| Very bad                               | 32          | 78              |          |
| Psychological fatigue                  |             |                 | 0.004‡   |
| Low                                    | 27          | 127             |          |
| Medium                                 | 45          | 207             |          |
| High                                   | 33          | 59              |          |
| Job satisfaction                       |             |                 | 0.025‡   |
| High                                   | 42          | 187             |          |
| Medium                                 | 33          | 144             |          |
| Low                                    | 30          | 62              |          |

a: mean± standard deviation; \*t-test, ‡Rank-sum test.

Multivariate logistic regression analysis revealed that age, sex, BMI, work shift,

frequent bending of the trunk, heavy or awkward lifting, psychological fatigue, job satisfaction, psychological job demand, skill discretion, decision-making authority and workplace supervisor support were independently associated with chronic LBP among ambulance nurses. For more details, see Table 4.

Table 4 Multivariate logistic regression analysis of chronic LBP risk factors among ambulance nurses.

| Factors                                             | B      | SE    | P      | OR (95% C.I.)        |
|-----------------------------------------------------|--------|-------|--------|----------------------|
| Age (years)                                         | 0.912  | 0.453 | 0.023  | 2.489 (1.024-6.049)  |
| Sex (1=female, 0=male)                              | 0.891  | 0.381 | 0.017  | 2.438 (1.155-5.144)  |
| BMI                                                 |        |       |        |                      |
| 18.5~23.9 (Normal weight)                           |        |       |        | Reference            |
| < 18.5 (Underweight)                                | -0.641 | 0.546 | 0.513  | 0.527 (0.181-1.536)  |
| 24.0~27.9 (Overweight)                              | 0.439  | 0.263 | 0.329  | 1.551 (0.926-2.597)  |
| ≥ 28.0 (Obesity)                                    | 1.638  | 0.313 | <0.001 | 5.145 (2.786-9.502)  |
| Whether takes shift work (1=shift work, 0=day work) | 1.005  | 0.223 | <0.001 | 2.732 (1.765-4.229)  |
| Ergonomic factors                                   |        |       |        |                      |
| Frequent bending of the trunk (1=yes, 0=no)         | 1.701  | 0.232 | <0.001 | 5.479 (3.477-8.634)  |
| Heavy or awkward lifting (1=yes, 0=no)              | 1.838  | 0.242 | <0.001 | 6.284 (3.911-10.098) |
| Psychosocial factors                                |        |       |        |                      |
| Psychological fatigue                               |        |       |        |                      |
| Low                                                 |        |       |        | Reference            |
| Medium                                              | 0.021  | 0.267 | 0.214  | 1.021 (0.605-1.723)  |
| High                                                | 0.968  | 0.296 | <0.001 | 2.633 (1.474-4.703)  |
| Job satisfaction                                    |        |       |        |                      |
| High                                                |        |       |        | Reference            |
| Medium                                              | 0.031  | 0.262 | 0.154  | 1.031 (0.617-1.724)  |
| Low                                                 | 0.768  | 0.279 | <0.001 | 2.155 (1.248-3.724)  |
| Occupational stress                                 |        |       |        |                      |
| Psychological job demand                            | 1.031  | 0.414 | <0.001 | 2.804 (1.246-6.312)  |
| Decision-making authority                           | -0.924 | 0.411 | <0.001 | 0.397 (0.177-0.888)  |
| Skill discretion                                    | -0.973 | 0.402 | <0.001 | 0.378 (0.172-0.831)  |
| Supervisor social support                           | -1.213 | 0.393 | <0.001 | 0.297 (0.138-0.642)  |

Multivariate logistic regression analysis also revealed that age, sex, BMI, frequent

bending of the trunk and psychological job demand were associated with chronic LBP among ambulance doctors and that age, BMI, sitting for long periods of time and psychological fatigue were associated with chronic LBP among ambulance drivers.

For more details, see Table 5.

Table 5 Multivariate logistic regression analysis of chronic LBP risk factors among ambulance doctors and among ambulance drivers.

| Factors                                        | B      | SE    | P      | OR (95% C.I.)        |
|------------------------------------------------|--------|-------|--------|----------------------|
| For doctors' chronic LBP                       |        |       |        |                      |
| Age (years)                                    | 1.031  | 0.448 | <0.001 | 2.804 (1.165-6.747)  |
| Sex (1=female, 0=male)                         | 0.502  | 0.253 | 0.034  | 1.652 (1.006-2.713)  |
| BMI                                            |        |       |        |                      |
| 18.5~23.9 (Normal weight)                      |        |       |        | Reference            |
| < 18.5 (Underweight)                           | -0.537 | 0.512 | 0.427  | 0.584 (0.214-1.594)  |
| 24.0~27.9 (Overweight)                         | 0.556  | 0.309 | 0.141  | 1.744 (0.952-3.195)  |
| ≥ 28.0 (Obesity)                               | 1.571  | 0.322 | <0.001 | 4.811 (2.560-9.044)  |
| Ergonomic factors                              |        |       |        |                      |
| Frequent bending of the trunk (1=yes, 0=no)    | 1.313  | 0.352 | <0.001 | 3.717 (1.865-7.411)  |
| Psychosocial factors                           |        |       |        |                      |
| Occupational stress                            |        |       |        |                      |
| Psychological job demand                       | 1.055  | 0.401 | <0.001 | 2.872 (1.309-6.303)  |
| For drivers' chronic LBP                       |        |       |        |                      |
| Age (years)                                    | 1.115  | 0.501 | 0.004  | 3.050 (1.142-8.141)  |
| BMI                                            |        |       |        |                      |
| 18.5~23.9 (Normal weight)                      |        |       |        | Reference            |
| < 18.5 (Underweight)                           | -0.722 | 0.473 | 0.643  | 0.486 (0.192-1.228)  |
| 24.0~27.9 (Overweight)                         | 0.948  | 0.305 | <0.001 | 2.581 (1.419-4.692)  |
| ≥ 28.0 (Obesity)                               | 1.804  | 0.354 | <0.001 | 6.074 (3.035-12.156) |
| Ergonomic factors                              |        |       |        |                      |
| Sitting for long periods of time (1=yes, 0=no) | 1.936  | 0.315 | <0.001 | 6.931 (3.738-12.851) |
| Psychosocial factors                           |        |       |        |                      |
| Psychological fatigue                          |        |       |        |                      |
| Low                                            |        |       |        | Reference            |
| Medium                                         | 0.557  | 0.275 | 0.002  | 1.745 (1.018-2.992)  |
| High                                           | 1.011  | 0.311 | <0.001 | 2.748 (1.494-5.056)  |

## Discussion

In this study, we found that the twelve-month prevalence of LBP lasting for at least 24 hours, seven days, and three months was 86.1%, 50.6% and 21.1%, respectively, among ambulance nurses; 70.5%, 36.4% and 15.8%, respectively, among ambulance doctors; and 57.5%, 23.8% and 12.3%, respectively, among ambulance drivers. The risk factors that were found for the ambulance nurses' chronic LBP were ergonomic factors (frequent bending of the trunk, heavy or awkward lifting), occupational stress (high psychological job demand, low job control and low workplace supervisor support), high psychological fatigue, low job satisfaction, shift work and individual factors (age, sex, obesity).

In our study, the prevalence of LBP lasting for at least 24 hours, seven days, and three months among ambulance nurses was statistically higher than that among ambulance doctors and drivers. Regarding LBP lasting for at least 24 hours, the prevalence was higher among ambulance nurses than the general nursing personnel in Greece (75%)<sup>26</sup>, Nepal (67%)<sup>27</sup>, Chinese Taiwan (66.0%)<sup>28</sup> and other countries<sup>26 29 30</sup>. Regarding chronic LBP (lasting for at least three months), the prevalence among ambulance nurses was higher than nursing personnel in the Netherlands (12%)<sup>26</sup>, Greece (11%)<sup>26</sup>, and Taiwan (8.6%)<sup>28</sup>. Although measurement variance, cultural differences and differences in the perception of terminology may exist among the above mentioned studies, more attention should be paid to the ambulance nurses' LBP. As reported by the COST B13 Working Group on Guidelines for the Management of



1  
2  
3  
4 Acute Low Back Pain in Primary Care, over 70% of people in industrialized countries  
5  
6 suffer from short-term or minor LBP at some point in their lives <sup>22 31</sup>, and most acute  
7  
8 LBP is a self-limiting symptom with a recovery rate of 90% within six weeks <sup>22 32</sup>.  
9  
10  
11 Serious or chronic LBP was caused mainly by work and other factors. Therefore, we  
12  
13 analysed the risk factors of chronic LBP other than short-term LBP.  
14  
15

16  
17 We found that ergonomic factors (the frequent bending of the trunk, heavy or  
18  
19 awkward lifting and sitting for long periods of time) were associated with chronic  
20  
21 LBP. In line with our study, a cross-sectional study <sup>28</sup> in Taiwan found that certain  
22  
23 manual patient-transfer tasks played important roles in severe LBP (such as care  
24  
25 seeking, intense pain, and sick leave). Patient handling, as one of the main tasks of  
26  
27 nurses, could generate a severe biomechanical load on spinal parts of the body and  
28  
29 could impose compressive and shear forces on nurses' low spine <sup>33</sup>. In contrast to the  
30  
31 ergonomic factors for chronic LBP among ambulance doctors (frequent bending of  
32  
33 the trunk) and drivers (sitting for long periods of time) and in contrast to the findings  
34  
35 of a cohort study <sup>34</sup> in Norway that showed that prolonged standing and awkward  
36  
37 lifting were important factors of the ergonomic factors for LBP, our study found the  
38  
39 frequent bending of the trunk and heavy or awkward lifting contributed to chronic  
40  
41 LBP, which again confirmed the above findings among ambulance nurses.  
42  
43

44  
45 Musculoskeletal loads and injuries resulting from patient-handling tasks need to be  
46  
47 reduced and could be reduced by efficient and cost-effective ergonomic intervention  
48  
49 measures, including sharing LBP knowledge, transferring equipment, lifting teams  
50  
51 and training in safe patient-transfer techniques reported by previous studies<sup>35</sup>.  
52  
53  
54  
55  
56  
57  
58  
59  
60

1  
2  
3  
4 Therefore, to prevent chronic LBP among ambulance nurses, ergonomic intervention  
5  
6  
7 measures need to be taken.

8  
9        Psychosocial factors are perceived feelings of the work environment that could  
10  
11 bring about psychological fatigue, job dissatisfaction and occupational stress <sup>36</sup>.  
12  
13  
14 Firstly, our study found that psychological fatigue and job satisfaction were all  
15  
16 associated with chronic LBP, consistent with the findings of other studies <sup>37 38</sup> that  
17  
18 showed that employees dissatisfied with their work were more prone to complain of  
19  
20 back pain. High psychological fatigue could not only negatively affect one's physical  
21  
22 and mental work performance but also increase the possibility of medical errors and  
23  
24 worker injuries <sup>39-42</sup>. Secondly, our study found that occupational stressors, including  
25  
26 high psychological job demand, low job control and low supervisor support, were  
27  
28 independently associated with chronic LBP, consistent with the findings of other  
29  
30 studies <sup>43 44</sup>. A cohort study <sup>34</sup> of the general working population in Norway showed  
31  
32 that psychosocial factors such as high psychological job demands and low job control  
33  
34 were reported as the most consistent and important predictors of LBP, in addition to  
35  
36 ergonomic factors. In a prospective study <sup>43</sup>, an increased risk of hospitalization due  
37  
38 to musculoskeletal disorders and an increased rate of musculoskeletal sickness were  
39  
40 reported to be associated with a lack of job control. In other studies <sup>44</sup>, poor job  
41  
42 content and low workplace social support were also shown to be risk factors for back  
43  
44 pain. Thirdly, in our study, workplace co-worker support was noted to be significantly  
45  
46 associated with chronic LBP in the univariate analysis but this association did not  
47  
48 remain in the multivariate logistic regression analysis, probably because the  
49  
50  
51  
52  
53  
54  
55  
56  
57  
58  
59  
60

1  
2  
3  
4 ambulance workers as a group, worked collaboratively, to some extent, and the factor  
5  
6 of co-worker support was not as significantly important as other psychological factors.  
7  
8  
9 Emergency ambulance nursing work not only requires high-intensity physical activity,  
10  
11 but also demands professional skills and rapid responses in emergencies, which affect  
12  
13 individuals' social psychology. Therefore, negative psychosocial work factors also  
14  
15 need to be decreased to an acceptable level to control chronic LBP among ambulance  
16  
17  
18  
19  
20 nurses.  
21  
22  
23  
24

25 We also found that age, sex, BMI and work shift (shift work vs. day work) were  
26  
27 associated with chronic LBP. Another cross-sectional study <sup>45</sup> of 1203 Iranian  
28  
29 petrochemical employees also reported that musculoskeletal disorders were  
30  
31 statistically more prevalent in shift workers than in day workers. In a prospective  
32  
33 study <sup>46</sup> of nurses' aides, LBP-related sick leaves were revealed to be correlated with  
34  
35 working night shifts. Regarding the many risk factors of chronic LBP among  
36  
37 ambulance nurses, one simple intervention measure alone may not be adequate <sup>47</sup>. To  
38  
39  
40  
41  
42  
43  
44  
45  
46  
47  
48  
49  
50  
51  
52  
53  
54  
55  
56  
57  
58  
59  
60

To our knowledge, this is the first large-scale survey aimed at exploring the LBP prevalence among ambulance workers and the risk factors for chronic LBP among ambulance nurses in China. The ambulance workers participating in the study were randomly selected in Shandong, China, and the response rate of 90.8% was acceptable.

1  
2  
3  
4 The limitations of our study included the use of self-reported measures and  
5  
6 retrospective questionnaires. Therefore, it is inevitable to suffer from measurement  
7  
8 bias. The cross-sectional design of the study precluded causal conclusions, and a  
9  
10 prospective cohort study might be needed in the future. Some of the 158 subjects who  
11  
12 failed to participate in the study might suffer from LBP, and the subjects who had left  
13  
14 their ambulance position due to serious LBP were not included in the study. Therefore,  
15  
16 the prevalence of LBP and the extent of its risk factors might be underestimated  
17  
18 accordingly.  
19  
20  
21  
22  
23  
24  
25  
26  
27

## 28 Conclusions

29  
30 This study suggests a relatively higher prevalence of LBP among ambulance nurses  
31  
32 than ambulance doctors and drivers. Psychosocial factors, such as occupational stress  
33  
34 and psychological fatigue, and ergonomic factors, such as the frequent bending of the  
35  
36 trunk and heavy or awkward lifting, played important roles in the development of  
37  
38 chronic LBP. Comprehensive intervention measures, including ergonomic and  
39  
40 occupational health intervention measures, might be suggested for LBP prevention.  
41  
42  
43  
44  
45  
46  
47

## 48 Contributors

49  
50 HD designed the study, participated in the data collection, and drafted and revised  
51  
52 the manuscript. QZ participated in the design of the work, data collection, data  
53  
54 analysis, interpretation of findings and revising the manuscript. CZ and GL  
55  
56 contributed to data collection, interpretation of findings, and revisions. All authors  
57  
58  
59  
60

1  
2  
3  
4 contributed to the paper revising and final approval of the version to be published.  
5

6 Competing interests None declared.  
7

8  
9 Patient consent Obtained.  
10

11 Ethics approval  
12

13  
14 The study was approved by the Ethics Committee of Shouguang People's Hospital  
15  
16  
17 (2016SD02011).  
18

19 Data sharing statement  
20

21  
22 The raw data used in the study are not publicly available due to ethical restrictions  
23  
24 and privacy protection but are available from the corresponding author on reasonable  
25  
26  
27 request.  
28  
29

30  
31  
32 References  
33

- 34  
35  
36  
37  
38  
39  
40 1. Sterud T, Ekeberg O, Hem E. Health status in the ambulance services: a systematic review. *BMC*  
41 *Health Serv Res* 2006;6:82. doi: 10.1186/1472-6963-6-82 [published Online First:  
42 2006/07/05]  
43  
44 2. Broniecki M, Esterman A, May E, et al. Musculoskeletal disorder prevalence and risk factors in  
45 ambulance officers. *J Back Musculoskelet Rehabil* 2010;23(4):165-74. doi:  
46 10.3233/bmr-2010-0265 [published Online First: 2010/11/17]  
47  
48 3. Sterud T, Hem E, Ekeberg O, et al. Health problems and help-seeking in a nationwide sample of  
49 operational Norwegian ambulance personnel. *BMC Public Health* 2008;8:3. doi:  
50 10.1186/1471-2458-8-3 [published Online First: 2008/01/08]  
51  
52 4. Xia T, Collie A. Work-related injury and illness in the Victorian healthcare sector: a retrospective  
53 analysis of workers. *Aust Health Rev* 2018 doi: 10.1071/ah18017 [published Online First:  
54 2018/12/06]  
55  
56 5. Hansen CD, Rasmussen K, Kyed M, et al. Physical and psychosocial work environment factors and  
57 their association with health outcomes in Danish ambulance personnel - a cross-sectional  
58 study. *BMC Public Health* 2012;12:534. doi: 10.1186/1471-2458-12-534 [published Online  
59 First: 2012/07/25]  
60

- 1  
2  
3 6. Roberts MH, Sim MR, Black O, et al. Occupational injury risk among ambulance officers and  
4 paramedics compared with other healthcare workers in Victoria, Australia: analysis of  
5 workers' compensation claims from 2003 to 2012. *Occup Environ Med* 2015;72(7):489-95.  
6 doi: 10.1136/oemed-2014-102574 [published Online First: 2015/03/18]  
7
- 8 7. McDonald M, DiBonaventura M, Ullman S. Musculoskeletal pain in the workforce: the effects of  
9 back, arthritis, and fibromyalgia pain on quality of life and work productivity. *J Occup  
10 Environ Med* 2011;53(7):765-70. doi: 10.1097/JOM.0b013e318222af81 [published Online  
11 First: 2011/06/21]  
12
- 13 8. Hignett S, Griffiths P, Murdey ID, et al. Assessing management of musculoskeletal disorders in the  
14 ambulance service. *Occup Med (Lond)* 2007;57(4):270-6. doi: 10.1093/occmed/kqm007  
15 [published Online First: 2007/03/06]  
16
- 17 9. Shiri R, Falah-Hassani K, Heliovaara M, et al. Risk Factors for Low Back Pain: A Population-Based  
18 Longitudinal Study. *Arthritis Care Res (Hoboken)* 2019;71(2):290-99. doi: 10.1002/acr.23710  
19 [published Online First: 2018/07/26]  
20
- 21 10. Stanislawska I, Mincewicz M, Cabak A, et al. Epidemiological Aspects of Low Back Pain. *Adv Exp  
22 Med Biol* 2019 doi: 10.1007/5584\_2019\_383 [published Online First: 2019/05/06]  
23
- 24 11. Vlaeyen JWS, Maher CG, Wiech K, et al. Low back pain. *Nat Rev Dis Primers* 2018;4(1):52. doi:  
25 10.1038/s41572-018-0052-1 [published Online First: 2018/12/14]  
26
- 27 12. da Costa BR, Vieira ER. Risk factors for work-related musculoskeletal disorders: A systematic  
28 review of recent longitudinal studies. *Am J Ind Med* 2010;53(3):285-323. doi:  
29 10.1002/ajim.20750 [published Online First: 2009/09/16]  
30
- 31 13. Ghaffari M, Alipour A, Farshad AA, et al. Effect of psychosocial factors on low back pain in  
32 industrial workers. *Occup Med (Lond)* 2008;58(5):341-7. doi: 10.1093/occmed/kqn006  
33 [published Online First: 2008/02/26]  
34
- 35 14. Coskun Cenk S. An analysis of the exposure to violence and burnout levels of ambulance staff.  
36 *Turk J Emerg Med* 2019;19(1):21-25. doi: 10.1016/j.tjem.2018.09.002 [published Online First:  
37 2019/02/23]  
38
- 39 15. Durand AC, Bompard C, Sportiello J, et al. Stress and burnout among professionals working in the  
40 emergency department in a French university hospital: Prevalence and associated factors.  
41 *Work* 2019;63(1):57-67. doi: 10.3233/wor-192908 [published Online First: 2019/05/28]  
42
- 43 16. Gorman VL. Future Emergency Nursing Workforce: What the Evidence Is Telling Us. *J Emerg  
44 Nurs* 2019;45(2):132-36. doi: 10.1016/j.jen.2018.09.009 [published Online First: 2018/12/12]  
45
- 46 17. Maguire BJ. Violence against ambulance personnel: a retrospective cohort study of national data  
47 from Safe Work Australia. *Public Health Res Pract* 2018;28(1) doi: 10.17061/phrp28011805  
48 [published Online First: 2018/03/28]
- 49 18. Maguire BJ, O'Meara P, O'Neill BJ, et al. Violence against emergency medical services personnel:  
50 A systematic review of the literature. *Am J Ind Med* 2018;61(2):167-80. doi:  
51 10.1002/ajim.22797 [published Online First: 2017/11/28]  
52
- 53 19. Kuorinka I, Jonsson B, Kilbom A, et al. Standardised Nordic questionnaires for the analysis of  
54 musculoskeletal symptoms. *Appl Ergon* 1987;18(3):233-7. [published Online First:  
55 1987/09/01]  
56
- 57 20. Hildebrandt VH, Bongers PM, van Dijk FJ, et al. Dutch Musculoskeletal Questionnaire: description  
58 and basic qualities. *Ergonomics* 2001;44(12):1038-55. doi: 10.1080/00140130110087437  
59 [published Online First: 2002/01/10]  
60

- 1
- 2
- 3
- 4 21. Li J, Yang W, Liu P, et al. Psychometric evaluation of the Chinese (mainland) version of Job
- 5 Content Questionnaire: a study in university hospitals. *Ind Health* 2004;42(2):260-7.
- 6 [published Online First: 2004/05/07]
- 7
- 8 22. van Tulder M, Becker A, Bekkering T, et al. Chapter 3. European guidelines for the management of
- 9 acute nonspecific low back pain in primary care. *Eur Spine J* 2006;15 Suppl 2:S169-91. doi:
- 10 10.1007/s00586-006-1071-2 [published Online First: 2006/03/22]
- 11
- 12 23. Yang L, Hildebrand V, Yu S, et al. The introduction of a musculoskeletal disorders
- 13 questionnaire-the questionnaire attached. *Industrial health and occupational diseases*
- 14 2009;1:25-31.
- 15
- 16 24. Du WW, Wang S, Wang JX, et al. [The assessment of reliability and validity of musculoskeletal
- 17 questionnaire]. *Zhonghua Lao Dong Wei Sheng Zhi Ye Bing Za Zhi* 2012;30(5):335-8.
- 18 [published Online First: 2012/07/19]
- 19
- 20 25. Yu S, Lu ML, Gu G, et al. Musculoskeletal symptoms and associated risk factors in a large sample
- 21 of Chinese workers in Henan province of China. *Am J Ind Med* 2012;55(3):281-93. doi:
- 22 10.1002/ajim.21037 [published Online First: 2011/11/30]
- 23
- 24 26. Alexopoulos EC, Burdorf A, Kalokerinou A. A comparative analysis on musculoskeletal disorders
- 25 between Greek and Dutch nursing personnel. *Int Arch Occup Environ Health* 2006;79(1):82-8.
- 26 doi: 10.1007/s00420-005-0033-z [published Online First: 2005/09/01]
- 27
- 28 27. Sharma S, Shrestha N, Jensen MP. Pain-related factors associated with lost work days in nurses
- 29 with low back pain: A cross-sectional study. *Scand J Pain* 2016;11:36-41. doi:
- 30 10.1016/j.sjpain.2015.11.007 [published Online First: 2016/04/01]
- 31
- 32 28. Feng CK, Chen ML, Mao IF. Prevalence of and risk factors for different measures of low back pain
- 33 among female nursing aides in Taiwanese nursing homes. *BMC Musculoskelet Disord*
- 34 2007;8:52. doi: 10.1186/1471-2474-8-52 [published Online First: 2007/06/27]
- 35
- 36 29. Coluci MZ, Alexandria NM. Job factors related to musculoskeletal symptoms among nursing
- 37 personnel--a review. *Work* 2012;41 Suppl 1:2516-20. doi: 10.3233/wor-2012-0492-2516
- 38 [published Online First: 2012/02/10]
- 39
- 40 30. Sadeghian F, Hosseinzadeh S, Aliyari R. Do Psychological Factors Increase the Risk for Low Back
- 41 Pain Among Nurses? A Comparing According to Cross-sectional and Prospective Analysis.
- 42 *Saf Health Work* 2014;5(1):13-6. doi: 10.1016/j.shaw.2013.11.004 [published Online First:
- 43 2014/06/17]
- 44
- 45 31. Scott NA, Moga C, Harstall C. Managing low back pain in the primary care setting: the know-do
- 46 gap. *Pain Res Manag* 2010;15(6):392-400. [published Online First: 2010/12/18]
- 47
- 48 32. European guidelines for the management of low back pain. *Acta Orthop Scand Suppl*
- 49 2002;73(305):20-5. [published Online First: 2003/01/28]
- 50
- 51 33. Jager M, Jordan C, Theilmeyer A, et al. Lumbar-load analysis of manual patient-handling activities
- 52 for biomechanical overload prevention among healthcare workers. *Ann Occup Hyg*
- 53 2013;57(4):528-44. doi: 10.1093/annhyg/mes088 [published Online First: 2012/12/21]
- 54
- 55 34. Sterud T, Tynes T. Work-related psychosocial and mechanical risk factors for low back pain: a
- 56 3-year follow-up study of the general working population in Norway. *Occup Environ Med*
- 57 2013;70(5):296-302. doi: 10.1136/oemed-2012-101116 [published Online First: 2013/01/17]
- 58
- 59 35. Hodder JN, MacKinnon SN, Ralhan A, et al. Effects of training and experience on patient transfer
- 60 biomechanics. *International Journal of Industrial Ergonomics* 2010;40(3):282-88. doi:  
<https://doi.org/10.1016/j.ergon.2010.01.007>



- 1  
2  
3  
4  
5  
6  
7  
8  
9  
10  
11  
12  
13  
14  
15  
16  
17  
18  
19  
20  
21  
22  
23  
24  
25  
26  
27  
28  
29  
30  
31  
32  
33  
34  
35  
36  
37  
38  
39  
40  
41  
42  
43  
44  
45  
46  
47  
48  
49  
50  
51  
52  
53  
54  
55  
56  
57  
58  
59  
60
36. Huang GD, Feuerstein M, Sauter SL. Occupational stress and work-related upper extremity disorders: concepts and models. *Am J Ind Med* 2002;41(5):298-314. doi: 10.1002/ajim.10045 [published Online First: 2002/06/20]
37. Jones AY, Lee RY. Cardiopulmonary resuscitation and back injury in ambulance officers. *Int Arch Occup Environ Health* 2005;78(4):332-6. doi: 10.1007/s00420-004-0577-3 [published Online First: 2005/04/14]
38. From the Centers for Disease Control and Prevention. Ambulance crash-related injuries among Emergency Medical Services workers--United States, 1991-2002. *JAMA* 2003;289(13):1628-9. doi: 10.1001/jama.289.13.1628 [published Online First: 2003/04/04]
39. Gander P, O'Keeffe K, Santos-Fernandez E, et al. Fatigue and nurses' work patterns: An online questionnaire survey. *Int J Nurs Stud* 2019;98:67-74. doi: 10.1016/j.ijnurstu.2019.06.011 [published Online First: 2019/07/19]
40. Hatch DJ, Freude G, Martus P, et al. Age, burnout and physical and psychological work ability among nurses. *Occup Med (Lond)* 2018;68(4):246-54. doi: 10.1093/occmed/kqy033 [published Online First: 2018/03/29]
41. Barker LM, Nussbaum MA. The effects of fatigue on performance in simulated nursing work. *Ergonomics* 2011;54(9):815-29. doi: 10.1080/00140139.2011.597878 [published Online First: 2011/08/23]
42. Silva T, Araujo WN, Stival MM, et al. Musculoskeletal discomfort, work ability and fatigue in nursing professionals working in a hospital environment. *Rev Esc Enferm USP* 2018;52:e03332. doi: 10.1590/s1980-220x2017022903332 [published Online First: 2018/06/14]
43. Yip VY. New low back pain in nurses: work activities, work stress and sedentary lifestyle. *J Adv Nurs* 2004;46(4):430-40. doi: 10.1111/j.1365-2648.2004.03009.x [published Online First: 2004/05/01]
44. Louw QA, Morris LD, Grimmer-Somers K. The prevalence of low back pain in Africa: a systematic review. *BMC Musculoskelet Disord* 2007;8:105. doi: 10.1186/1471-2474-8-105 [published Online First: 2007/11/03]
45. Choobineh A, Soltanzadeh A, Tabatabaee H, et al. Health effects associated with shift work in 12-hour shift schedule among Iranian petrochemical employees. *Int J Occup Saf Ergon* 2012;18(3):419-27. doi: 10.1080/10803548.2012.11076937 [published Online First: 2012/09/22]
46. Eriksen W, Bruusgaard D, Knardahl S. Work factors as predictors of intense or disabling low back pain; a prospective study of nurses' aides. *Occup Environ Med* 2004;61(5):398-404. [published Online First: 2004/04/20]
47. Tullar JM, Brewer S, Amick BC, 3rd, et al. Occupational safety and health interventions to reduce musculoskeletal symptoms in the health care sector. *J Occup Rehabil* 2010;20(2):199-219. doi: 10.1007/s10926-010-9231-y [published Online First: 2010/03/12]



1  
2  
3  
4  
5  
6  
7  
8  
9  
10  
11  
12  
13  
14  
15  
16  
17  
18  
19  
20  
21  
22  
23  
24  
25  
26  
27  
28  
29  
30  
31  
32  
33  
34  
35  
36  
37  
38  
39  
40  
41  
42  
43  
44  
45  
46  
47  
48  
49  
50  
51  
52  
53  
54  
55  
56  
57  
58  
59  
60STROBE Statement—Checklist of items that should be included in reports of *cross-sectional studies*

|                           | Item No | Recommendation                                                                                                                                                                                    | Page No        |
|---------------------------|---------|---------------------------------------------------------------------------------------------------------------------------------------------------------------------------------------------------|----------------|
| <b>Title and abstract</b> | 1       | (a) Indicate the study's design with a commonly used term in the title or the abstract                                                                                                            | 2              |
|                           |         | (b) Provide in the abstract an informative and balanced summary of what was done and what was found                                                                                               | 2-3            |
| <b>Introduction</b>       |         |                                                                                                                                                                                                   |                |
| Background/rationale      | 2       | Explain the scientific background and rationale for the investigation being reported                                                                                                              | 4-5            |
| Objectives                | 3       | State specific objectives, including any prespecified hypotheses                                                                                                                                  | 4-6            |
| <b>Methods</b>            |         |                                                                                                                                                                                                   |                |
| Study design              | 4       | Present key elements of study design early in the paper                                                                                                                                           | 6              |
| Setting                   | 5       | Describe the setting, locations, and relevant dates, including periods of recruitment, exposure, follow-up, and data collection                                                                   | 6-7            |
| Participants              | 6       | (a) Give the eligibility criteria, and the sources and methods of selection of participants                                                                                                       | 6-7            |
| Variables                 | 7       | Clearly define all outcomes, exposures, predictors, potential confounders, and effect modifiers. Give diagnostic criteria, if applicable                                                          | 7-8            |
| Data sources/measurement  | 8*      | For each variable of interest, give sources of data and details of methods of assessment (measurement). Describe comparability of assessment methods if there is more than one group              | 8-9            |
| Bias                      | 9       | Describe any efforts to address potential sources of bias                                                                                                                                         | 8-9            |
| Study size                | 10      | Explain how the study size was arrived at                                                                                                                                                         | 6              |
| Quantitative variables    | 11      | Explain how quantitative variables were handled in the analyses. If applicable, describe which groupings were chosen and why                                                                      | 8-9            |
| Statistical methods       | 12      | (a) Describe all statistical methods, including those used to control for confounding                                                                                                             | 8-9            |
|                           |         | (b) Describe any methods used to examine subgroups and interactions                                                                                                                               | 8-9            |
|                           |         | (c) Explain how missing data were addressed                                                                                                                                                       | 9, 10, results |
|                           |         | (d) If applicable, describe analytical methods taking account of sampling strategy                                                                                                                | 6              |
|                           |         | (e) Describe any sensitivity analyses                                                                                                                                                             | 8-9            |
| <b>Results</b>            |         |                                                                                                                                                                                                   |                |
| Participants              | 13*     | (a) Report numbers of individuals at each stage of study—eg numbers potentially eligible, examined for eligibility, confirmed eligible, included in the study, completing follow-up, and analysed | 6, 10          |
|                           |         | (b) Give reasons for non-participation at each stage                                                                                                                                              | 6, 10          |
|                           |         | (c) Consider use of a flow diagram                                                                                                                                                                | no             |
| Descriptive data          | 14*     | (a) Give characteristics of study participants (eg demographic, clinical, social) and information on exposures and potential confounders                                                          | 10-11          |
|                           |         | (b) Indicate number of participants with missing data for each variable of interest                                                                                                               | 10             |
| Outcome data              | 15*     | Report numbers of outcome events or summary measures                                                                                                                                              | 10-11          |
| Main results              | 16      | (a) Give unadjusted estimates and, if applicable, confounder-adjusted estimates and their precision (eg, 95% confidence interval). Make clear                                                     | 10-14          |

|                          |    |                                                                                                                                                                            |               |
|--------------------------|----|----------------------------------------------------------------------------------------------------------------------------------------------------------------------------|---------------|
|                          |    | which confounders were adjusted for and why they were included                                                                                                             |               |
|                          |    | (b) Report category boundaries when continuous variables were categorized                                                                                                  | 10-11, tables |
|                          |    | (c) If relevant, consider translating estimates of relative risk into absolute risk for a meaningful time period                                                           | no            |
| Other analyses           | 17 | Report other analyses done—eg analyses of subgroups and interactions, and sensitivity analyses                                                                             | 14, 15        |
| <b>Discussion</b>        |    |                                                                                                                                                                            |               |
| Key results              | 18 | Summarise key results with reference to study objectives                                                                                                                   | 16-17         |
| Limitations              | 19 | Discuss limitations of the study, taking into account sources of potential bias or imprecision. Discuss both direction and magnitude of any potential bias                 | 19-20         |
| Interpretation           | 20 | Give a cautious overall interpretation of results considering objectives, limitations, multiplicity of analyses, results from similar studies, and other relevant evidence | 16-20         |
| Generalisability         | 21 | Discuss the generalisability (external validity) of the study results                                                                                                      | 19-20         |
| <b>Other information</b> |    |                                                                                                                                                                            |               |
| Funding                  | 22 | Give the source of funding and the role of the funders for the present study and, if applicable, for the original study on which the present article is based              | 1, title page |

\*Give information separately for exposed and unexposed groups.

**Note:** An Explanation and Elaboration article discusses each checklist item and gives methodological background and published examples of transparent reporting. The STROBE checklist is best used in conjunction with this article (freely available on the Web sites of PLoS Medicine at <http://www.plosmedicine.org/>, Annals of Internal Medicine at <http://www.annals.org/>, and Epidemiology at <http://www.epidem.com/>). Information on the STROBE Initiative is available at [www.strobe-statement.org](http://www.strobe-statement.org).
